# Supplementary material for: Conserved and species-specific transcription factor co-binding patterns drive divergent gene regulation in human and mouse
Source: PubMed Central journal article supplement — Nucleic Acids Res. 2018 Jan 19;46(4):1878–94. doi: 10.1093/nar/gky018 (PMC5829737; doi:10.1093/nar/gky018), 2018-01-19
Supplement: gky018_supp.pdf [file gky018_supp.pdf]

## Supplementary Material

### Conserved and species-specific transcription factor co-binding patterns drive divergent gene regulation in human and mouse

Adam G. Diehl<sup>1</sup>, Alan P. Boyle<sup>1,2\*</sup>

<sup>1</sup>Department of Computational Medicine and Bioinformatics, University of Michigan, Ann Arbor, MI 48109, USA

<sup>2</sup>Department of Human Genetics, University of Michigan, Ann Arbor, MI 48109, USA

#### List of Supplementary Items

|                    |                                                                                                                                                                                                                   |    |
|--------------------|-------------------------------------------------------------------------------------------------------------------------------------------------------------------------------------------------------------------|----|
| <b>Figure S1.</b>  | Effects of removing patterns present in 10,000 random data permutations.                                                                                                                                          | 2  |
| <b>Figure S2.</b>  | Grammatical pattern distributions within positional classes.                                                                                                                                                      | 3  |
| <b>Figure S3.</b>  | Gain/loss phylogeny.                                                                                                                                                                                              | 3  |
| <b>Figure S4.</b>  | Aggregate grammatical classes explained.                                                                                                                                                                          | 4  |
| <b>Figure S5.</b>  | Frequency histograms of functional annotations associated with regulatory function in six aggregate grammatical classes after excluding the two largest cohesin-related grammatical patterns from the MCKG class. | 5  |
| <b>Figure S6.</b>  | Conserved PhastCons scores cluster near ChIP-seq peak summits in all fractions of the dataset.                                                                                                                    | 6  |
| <b>Figure S7.</b>  | Grammatical patterns predict matched chromatin states more accurately than positional conservation of chromatin states predicts matched grammatical patterns.                                                     | 7  |
| <b>Figure S8.</b>  | Graphical definition of counting conventions used in chromatin state heatmaps.                                                                                                                                    | 8  |
| <b>Figure S9.</b>  | Chromatin state overlaps in individual cell types by grammatical and positional class.                                                                                                                            | 10 |
| <b>Figure S10.</b> | Cell-specificity of chromatin states is not affected by inclusion thresholds.                                                                                                                                     | 11 |
| <b>Table S1.</b>   | Identification of transcription factor binding datasets used in this project.                                                                                                                                     | 14 |
| <b>Table S2.</b>   | Identification of chromHMM annotations used in this project.                                                                                                                                                      | 16 |
| <b>Table S3.</b>   | Identification of DNase-seq datasets used in this project.                                                                                                                                                        | 16 |
| <b>Table S4.</b>   | Identification of RNA-seq datasets used in this project.                                                                                                                                                          | 16 |
| <b>Table S5.</b>   | Orthology statistics and PhastCons element intersections for human and mouse CRMs and background sequences.                                                                                                       | 17 |
| <b>Table S6.</b>   | Percentage of CRMs and background sequences overlapping DNaseI hypersensitive (DHS) sites.                                                                                                                        | 17 |
| <b>Table S7.</b>   | Percentage of CRMs and background sequences marked with ChromHMM active chromatin states.                                                                                                                         | 18 |
| <b>Table S8.</b>   | GWAS Ontology terms and associated functional classifications.                                                                                                                                                    | 19 |
| <b>Table S9.</b>   | GWAS Ontology term enrichments in the pooled dataset.                                                                                                                                                             | 27 |
| <b>Table S10.</b>  | GWAS Ontology term enrichments by aggregate grammatical class.                                                                                                                                                    | 28 |
| <b>Table S11.</b>  | GWAS Ontology term enrichments by individual grammatical class.                                                                                                                                                   | 28 |

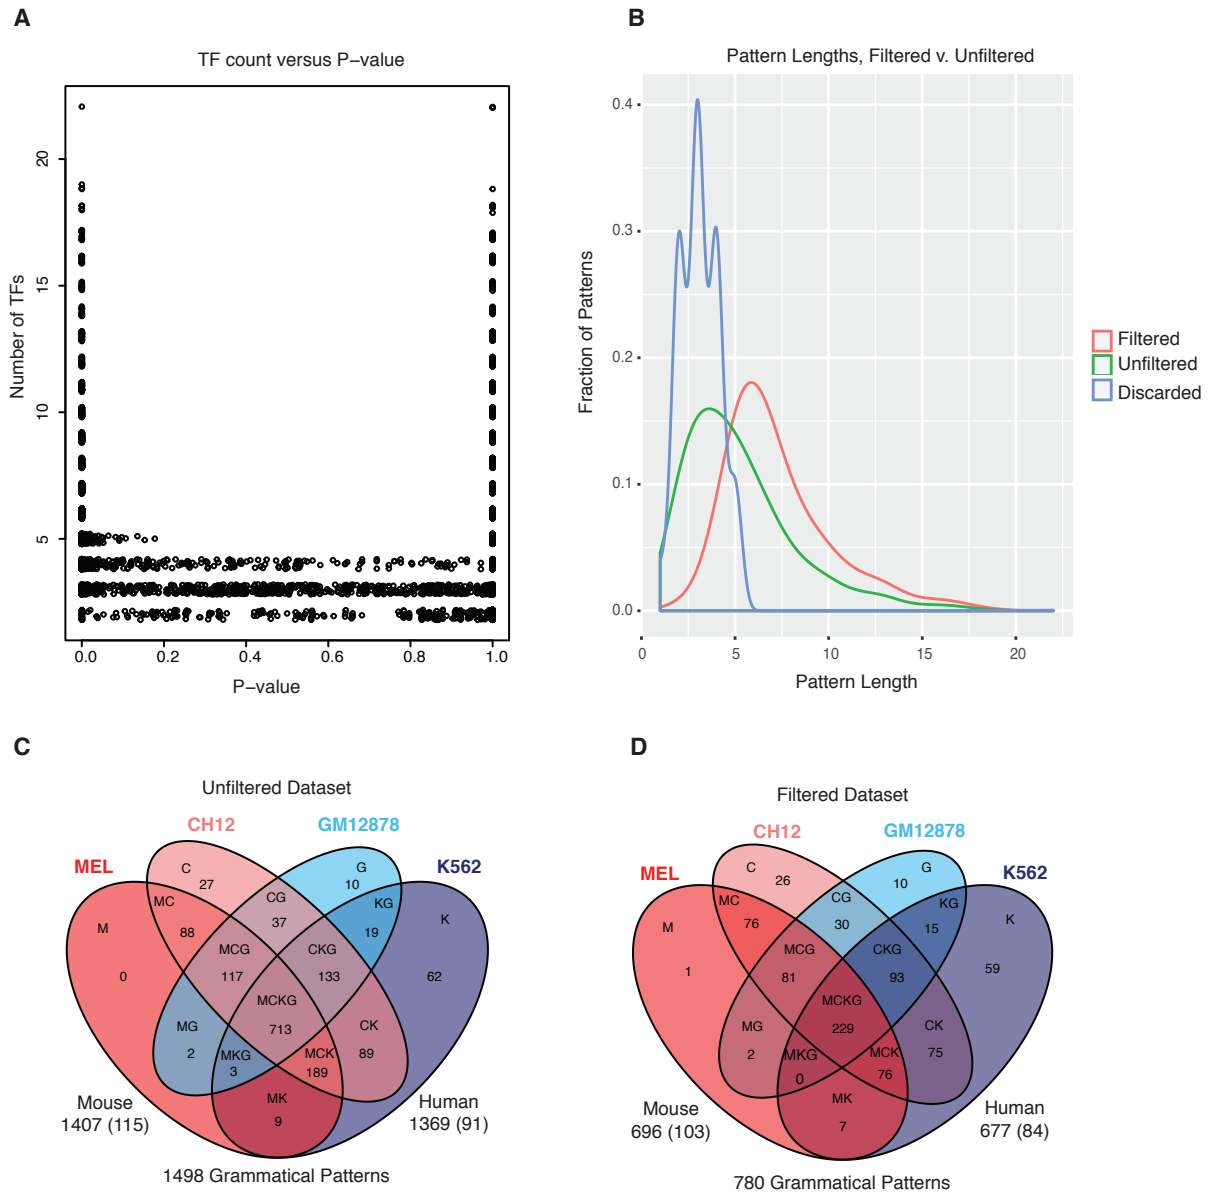

**Figure S1. Effects of removing patterns present in 10,000 random data permutations.**

**(A)** Distribution of p-values relative to grammatical pattern lengths in the unfiltered dataset shows no apparent difference between long and short patterns at either end of the p-value spectrum. **(B)** Length distributions of grammatical patterns in the unfiltered dataset, filtered, and discarded fractions of the dataset. Although the bulk of filtered patterns contained between 2 and 5 factors, removing these patterns caused a mean shift of only 2 units between the unfiltered and filtered datasets, with no effect on maximum and minimum pattern lengths. **(C-D)** Venn diagrams show the segmentation of regulatory space into 15 possible grammatical and positional classes in the unfiltered dataset (C) and filtered dataset (D). The first letter of each cell type was used to construct a class label for each cell in the diagrams. These labels describe the cell-specificity of the corresponding grammatical patterns and positionally-conserved loci. Each segment in the Venn diagrams is labelled with its grammatical class and the number of grammatical patterns assigned to the class. **(C)** The unfiltered dataset contains a total of 1498 grammatical patterns, 86% of which are shared between human and mouse. **(D)** The filtered dataset contains a total of 780 grammatical patterns, 76% of which are shared between human and mouse. Therefore, data filtration did not bias our observations towards increased conservation.

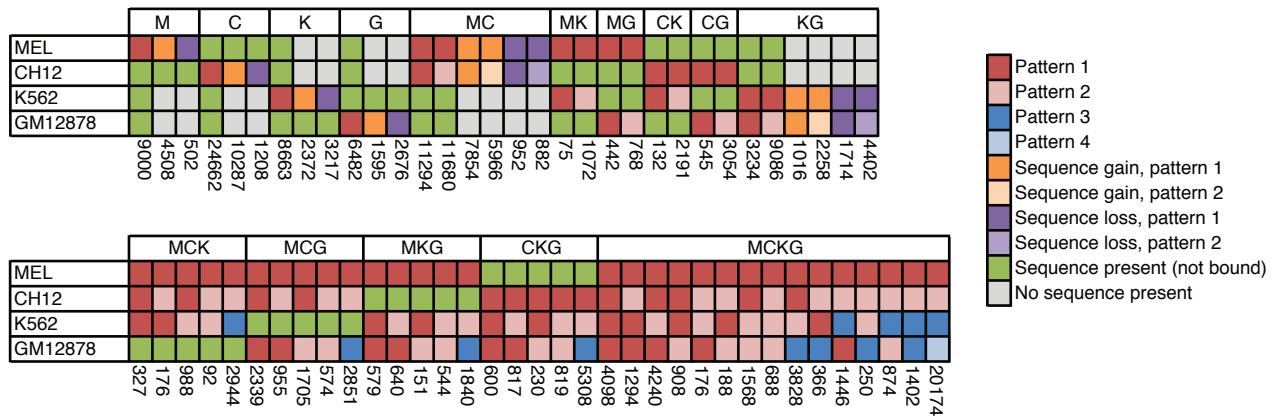

**Figure S2. Grammatical pattern distributions within positional classes.**

Each column in the matrix represents a combination of matched or mismatched patterns between sequences bound at the same locus. Column headings indicate the positional class represented by a set of columns and the number below each column represents the total number of CRMs within the subset. Cells with matching colors in a column share the same grammatical pattern while cells with mismatched colors are occupied by different grammatical patterns. Green cells indicate sequences which are physically present, but are not occupied in the given cell type. Grey cells indicate sequences which are physically absent in the given species as a result of sequence gain or loss. Orange hues indicate species-specific sequence gains and purple hues indicate sequence losses in the other species, based on phylogenetic maximum parsimony prediction using three outgroup species.

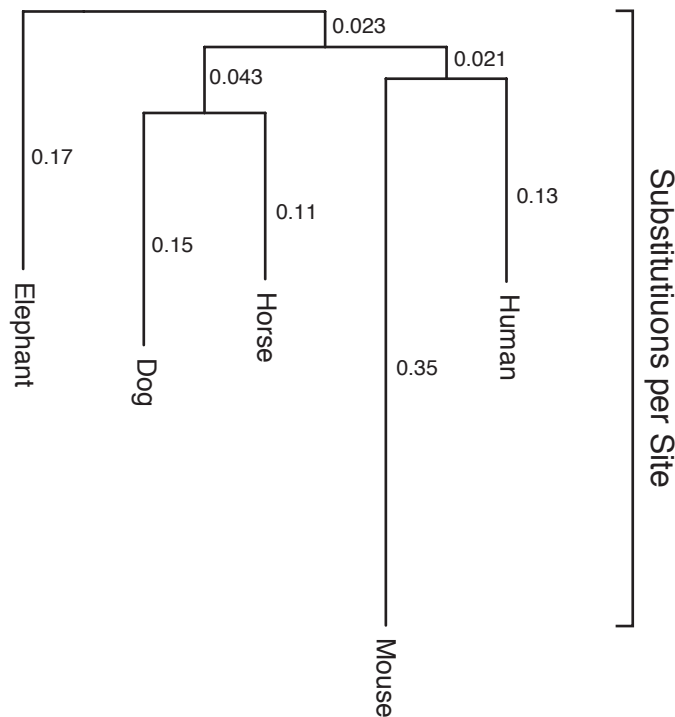

**Figure S3. Gain/loss phylogeny.**

Phylogenetic tree describing evolutionary relationships between human, mouse and the outgroup species horse, dog and elephant, used in assigning non-orthologous CRMs as species-specific gains or losses.

### Aggregate Grammatical Classes

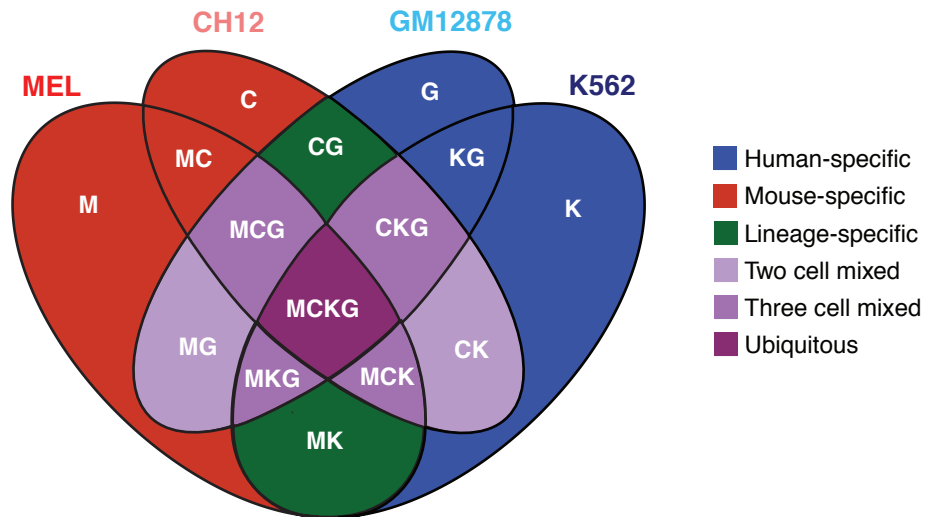

**Figure S4. Aggregate grammatical classes explained.**

Grammatical classes were aggregated into six species-specific and tissue-specific aggregate grammatical classes to facilitate further analysis of functional specificity.

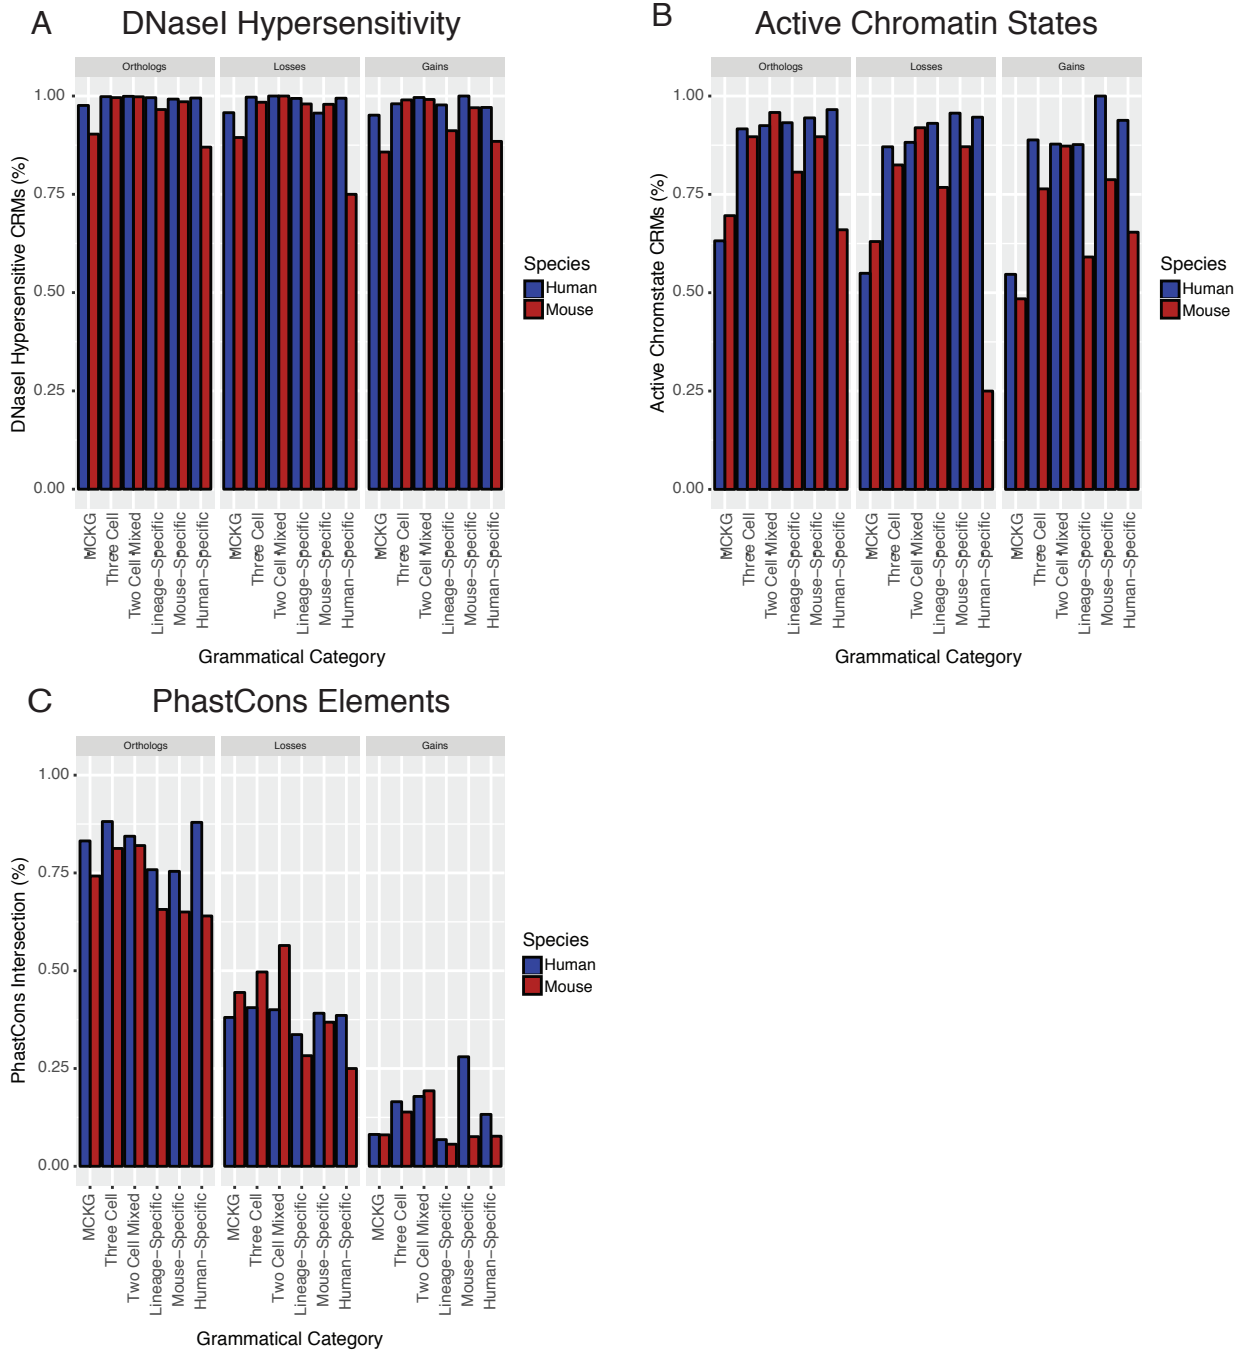

**Figure S5. Frequency histograms of functional annotations associated with regulatory function in six aggregate grammatical classes after excluding the two largest cohesin-related grammatical patterns from the MCKG class.**

**(A)** Intersection with DNaseI Hypersensitive Sites **(B)** Intersection with ChromHmm active chromatin states. **(C)** Intersection with PhastCons elements.

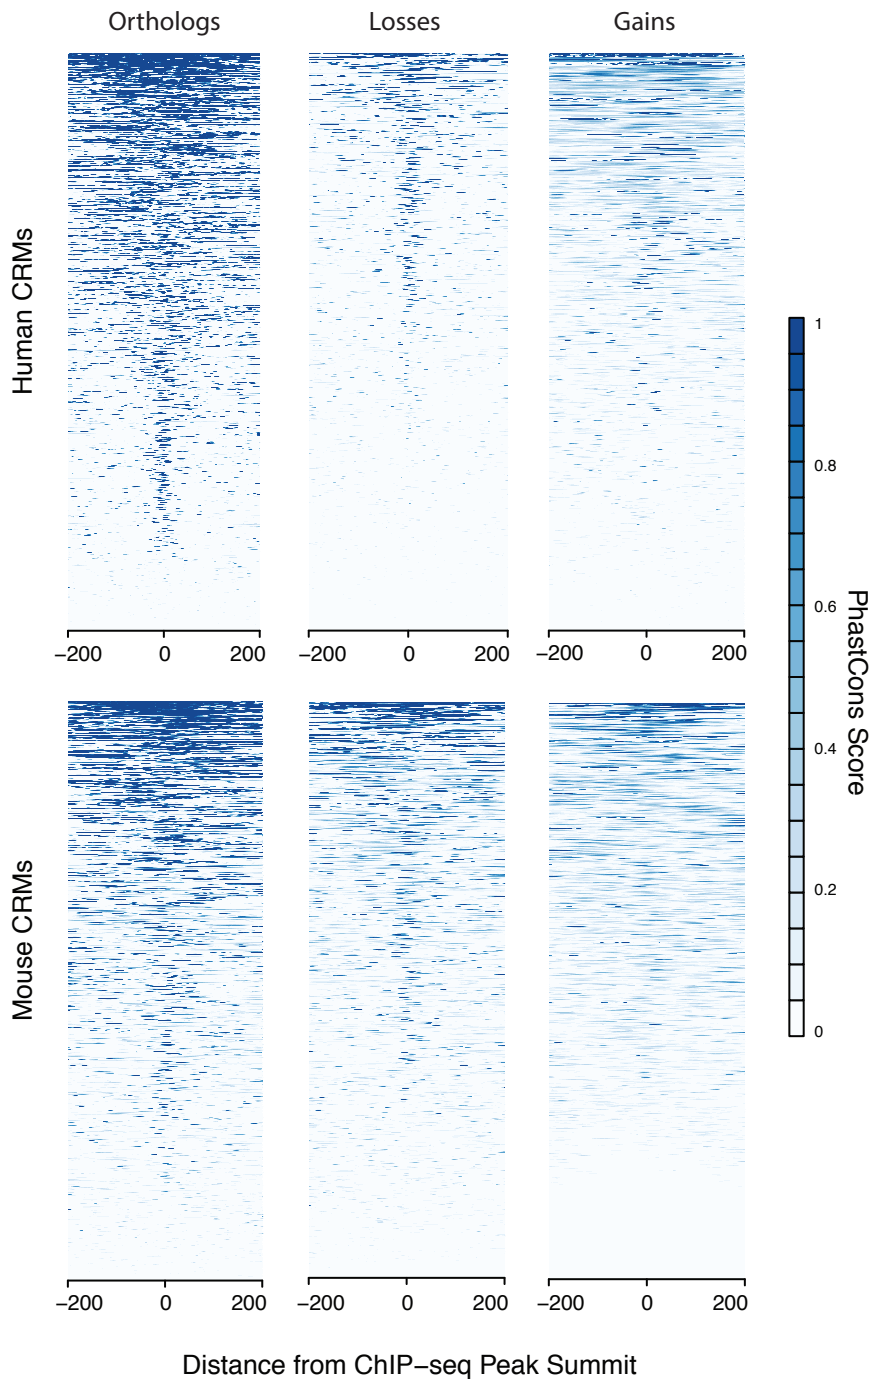

**Figure S6. Conserved PhastCons scores cluster near ChIP-seq peak summits in all fractions of the dataset.**

PhastCons scores within 400bp windows centered over ChIP-seq peak summits from 1000 randomly-selected CRMs classified as orthologs, losses, and gains in Human and Mouse. Clustering of scores approaching 1 centered around ChIP-seq peak summits suggests significant contributions of occupied TFBS to overall conservation in many CRMs. Scores approaching 1 in more distant foci may correspond with additional TFBSs for which we lack ChIP-seq data, TFBSs occupied only in other cell types, or other classes of functional sequence not annotated in the current study. Longer stretches of high PhastCons scores, concentrated among the top rows of all groups, likely reflect the “smoothing” effect of the PhastCons hidden Markov model over stretches of DNA containing multiple conserved features in close proximity.

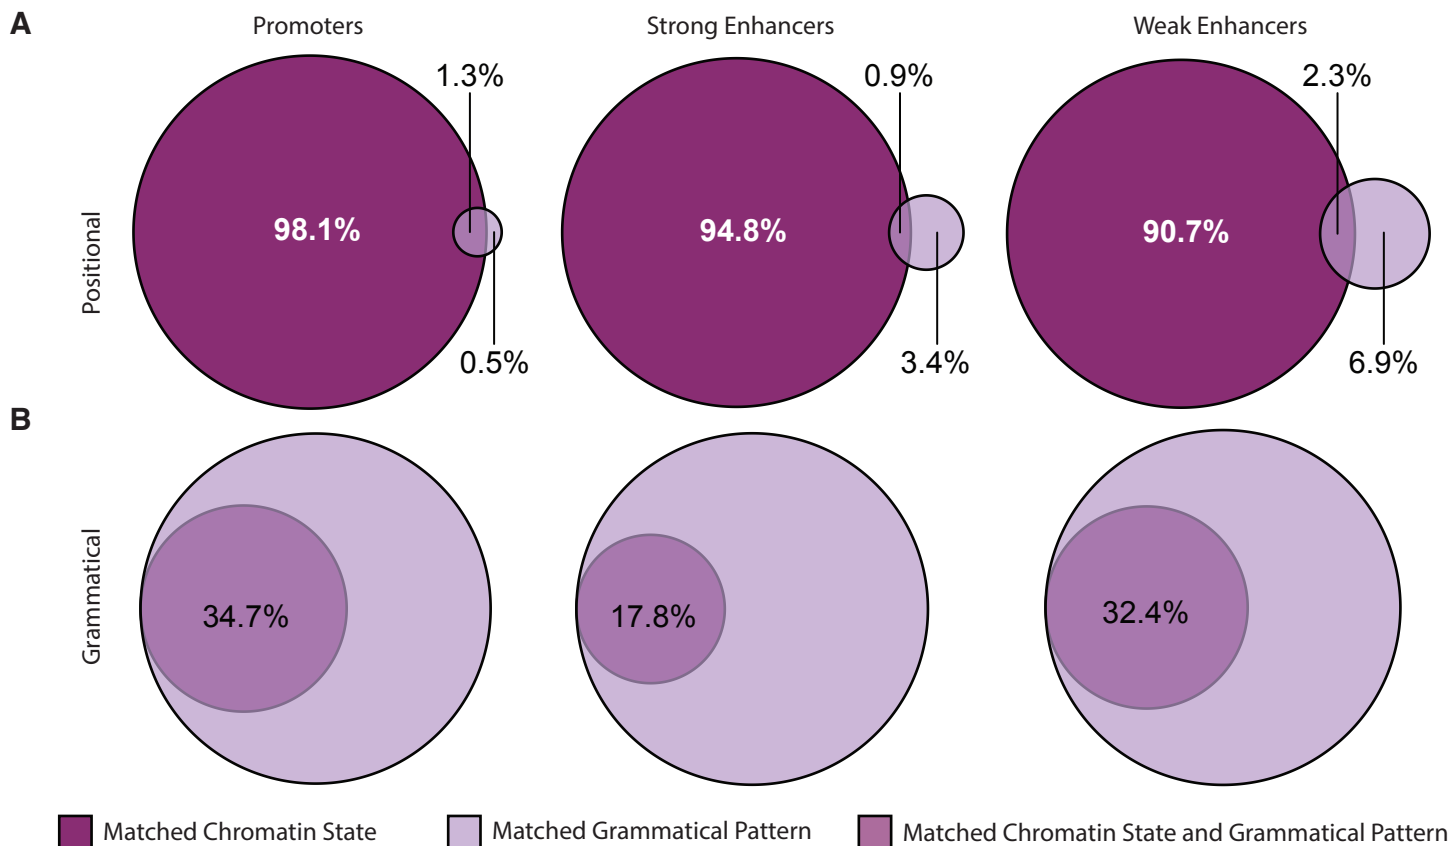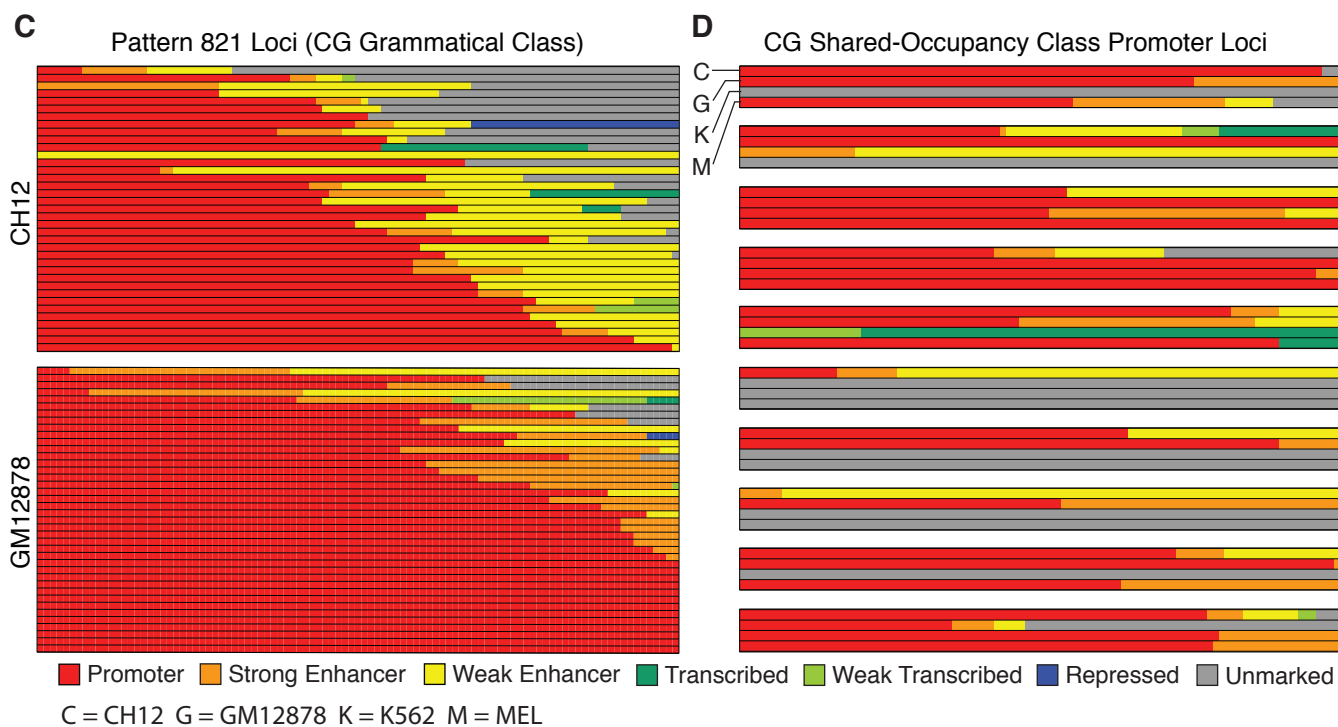

**Figure S7. Grammatical patterns predict matched chromatin states more accurately than positional conservation of chromatin states predicts matched grammatical patterns.** (A) Fractions of positionally-conserved locus pairs with matched Promoter, Strong Enhancer, or Weak Enhancer chromatin states and/or grammatical patterns. (B) Fractions of locus pairs within grammatical patterns where the underlying Promoter, Strong Enhancer, or Weak Enhancer chromatin state

also matches. **(C)** Chromatin states within all 77 CRMs CRMs in grammatical pattern 821 (CG grammatical class (M and K)). **(D)** Ten randomly-selected orthologous loci representing positional class CG and containing the promoter state in one or both of C and G. Each block represents a different genomic locus, with individual rows representing the chromatin states observed in the cell type indicated.

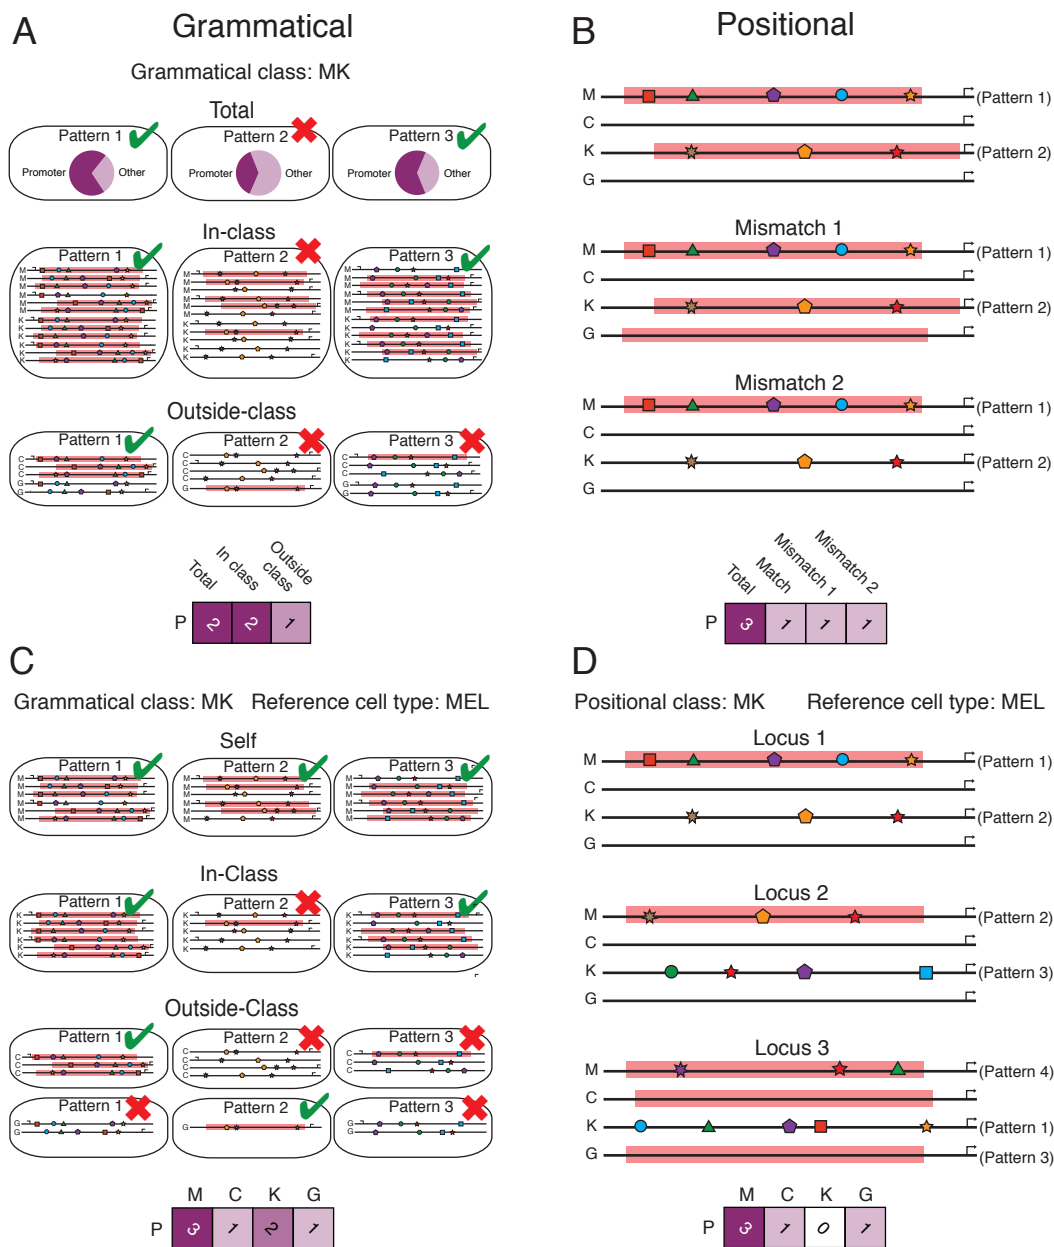

**Figure S8. Graphical definition of counting conventions used in chromatin state heatmaps.** In all panels, a theoretical set of loci or patterns are given with associated data for the promoter chromatin state, and the accompanying heatmap shows the result from the applicable counting procedure. **(A)** For Fig 4C, counts are aggregated over all grammatical patterns. All grammatical patterns in which  $\geq 50\%$  of CRMs carry a given state are counted in the total column. Among these patterns, In-class:  $\geq 50\%$  of CRMs in cells belonging to the grammatical class carry the state. Outside class:  $\geq 50\%$  of modules from nonmember cells carry the state. **(B)** For Fig 4D, counts are pooled over all positionally-conserved loci. All loci carrying a given state in  $\geq 1$  occupied cell are counted toward the total column. Match: the cell-specificity of chromatin states matches that expected based on the positional class. Mismatch 1: 1 or more cells not included in the positional class carry



the given state. Mismatch 2: 1 or more cells within the positional class lack the given state. **(C)** For sup fig 5A, counts represent the number of times a chromatin mark was observed in  $\geq 50\%$  of peaks from a given pattern within a grammatical class in one cell type given that it was observed in  $\geq 50\%$  of peaks from the pattern in a reference cell type. **(D)** For sup fig 5B, counts represent the number of observations in which a chromatin mark was observed at a positional locus in one cell given that it

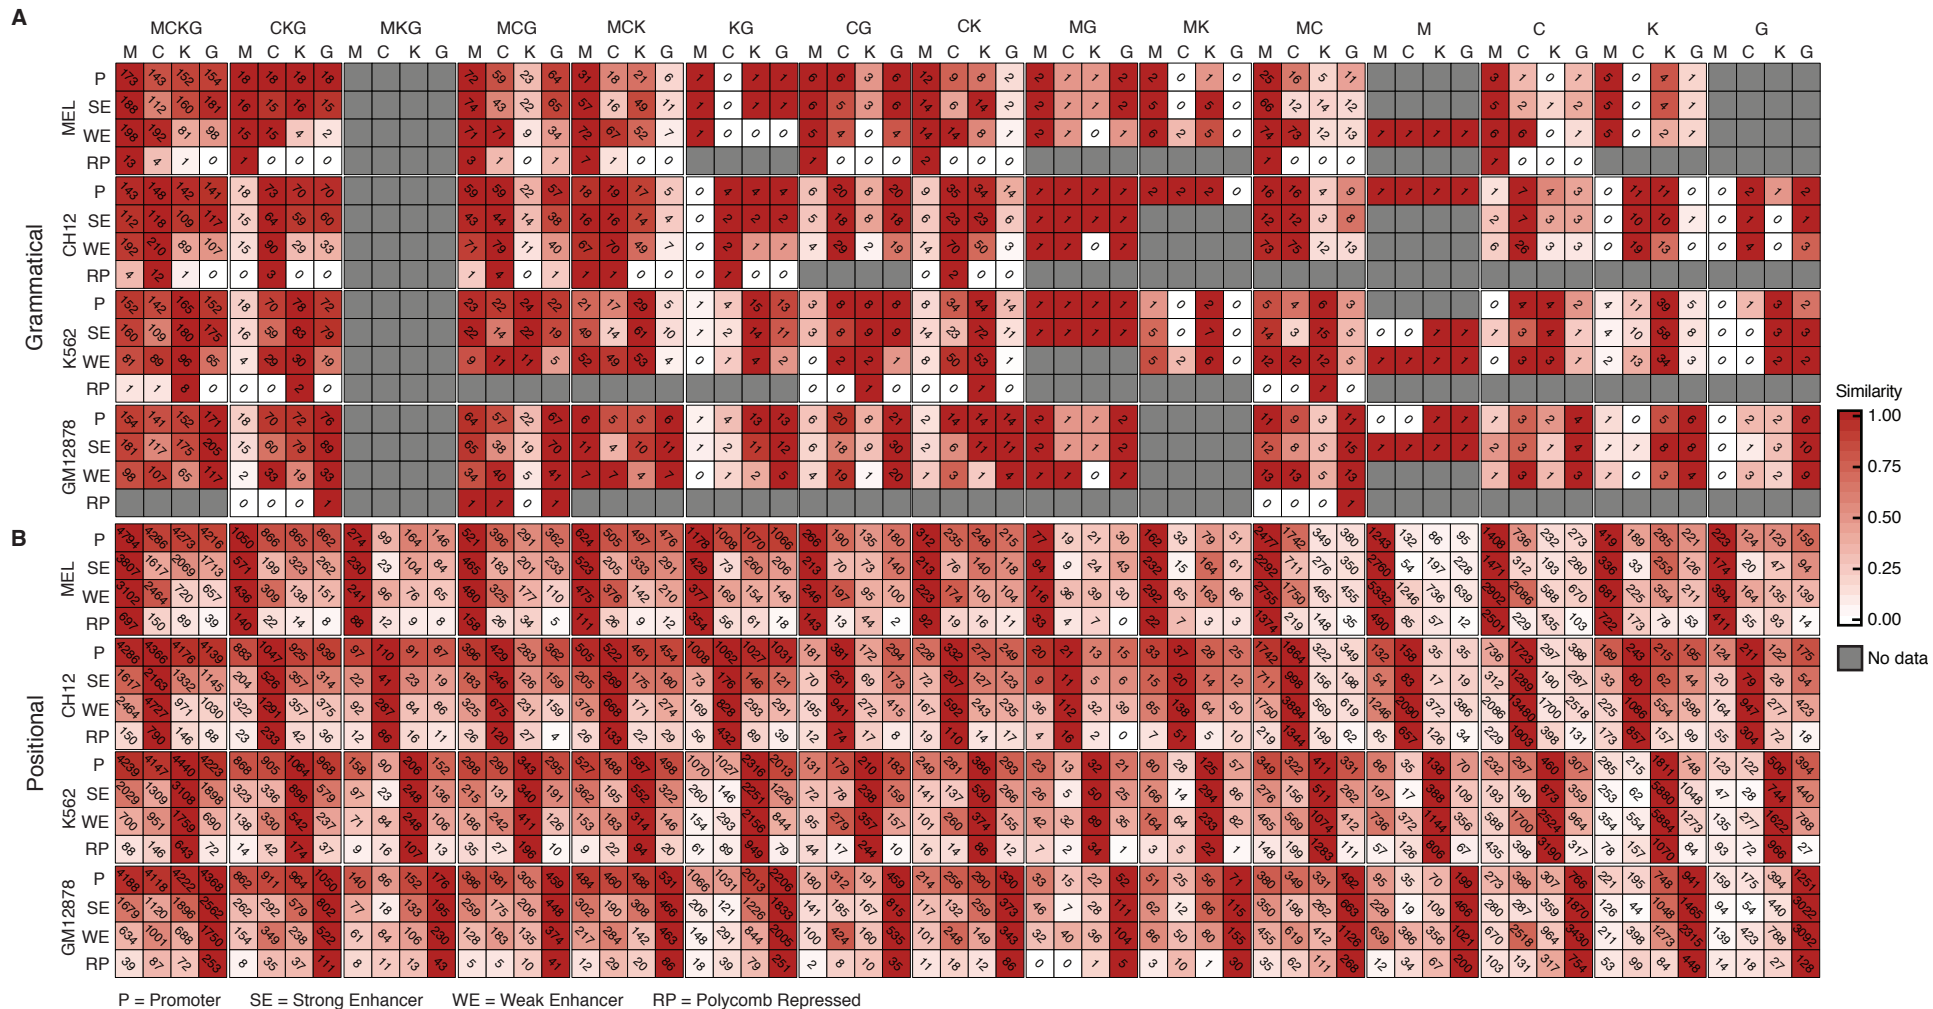

**Figure 9. Chromatin state overlaps in individual cell types by grammatical and positional class.** Heat maps describe the degree of conservation of ChromHMM chromatin states between loci in positional classes and patterns in grammatical classes representing a non-collapsed view of Fig. 4. Shading densities within each cell represent the fraction of loci or patterns that carry the given chromatin state markers. **(A)** Within grammatical classes, the frequency of overlap for each cell type with a matching module annotation in at least 50% of the loci from all other cell types. This is analogous to “inside class”, on a per cell basis, from Fig. 4C. **(B)** Within positional classes, the frequency of overlap for each cell type with a matching module annotation in at the same loci from all other cell types. This is analogous to “match” on a per cell basis from Fig. 4D.

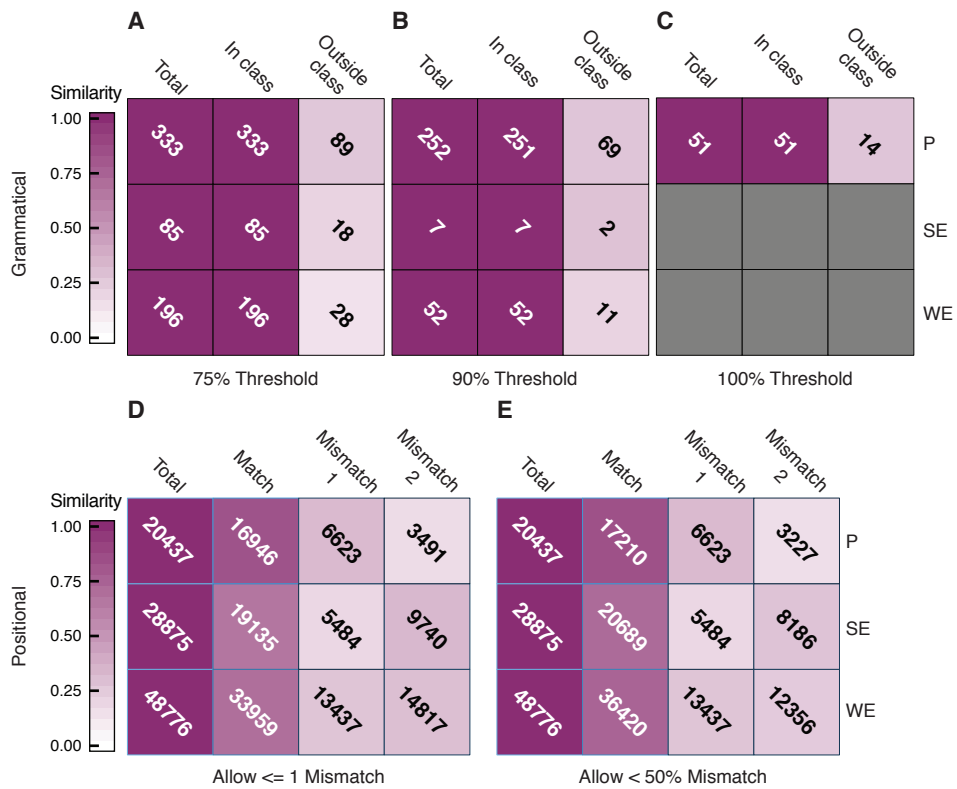

**Figure S10. Cell-specificity of chromatin states is not affected by inclusion thresholds.**

**(A-C)** Thresholds for grammatical patterns are arranged in order of increasing stringency. **(A)** Cell-specificity of chromatin states for grammatical patterns, requiring  $\geq 75\%$  of CRMs within a pattern include a given state. **(B)** Cell-specificity of chromatin states for grammatical patterns, requiring  $\geq 90\%$  of CRMs within a pattern include a given state. **(C)** Cell-specificity of chromatin states for grammatical patterns, requiring 100% of CRMs within a pattern include a given state. **(D and E)** Thresholds for positional classes are arranged in order of decreasing stringency. **(D)** Cell-specificity of chromatin states for positional classes, allowing up to 1 mismatch before a locus is counted toward either mismatch category. **(E)** Cell-specificity of chromatin states for positional classes, allowing 1 mismatch for loci occupied in 3 cells and up to 2 mismatches in loci occupied in 4 cells, before a locus is counted toward either mismatch categories.

**Table S1.**

Identification of transcription factor binding datasets used in this project. All data were obtained from the ENCODE project through [encodeproject.org](http://encodeproject.org). Accession numbers are provided along with organism, cell, and other relevant information.

**Table S2.**

Identification of chromHMM annotations used in this project. All data were obtained from the ENCODE project through [encodeproject.org](http://encodeproject.org). Accession numbers are provided along with organism, cell, and other relevant information.

**Table S3.**

Identification of DNase-seq datasets used in this project. All data were obtained from the ENCODE project through [encodeproject.org](http://encodeproject.org). Accession numbers are provided along with organism, cell, and other relevant information.

**Table S4.**

Identification of RNA-seq datasets used in this project. All data were obtained from the ENCODE project through [encodeproject.org](http://encodeproject.org). Accession numbers are provided along with organism, cell, and other relevant information.

**Table S5.**

Orthology statistics and PhastCons element intersections for human and mouse CRMs and background sequences. Numbers of CRMs/background sequences, percent sequences mappable by `bnMapper`, and percent of sequences containing  $\leq 1$  phastCons element are given for mouse and human sequences for the total dataset, orthologous CRMs, unmapped CRMs (gains and losses combined), species-specific gains and species-specific losses. Odds ratios and p-values were calculated using individual Fisher's Exact tests against matched background sequences. P-values were corrected for multiple testing with the holm method.

**Table S6.**

Percentage of CRMs and background sequences overlapping DNaseI hypersensitive (DHS) sites. The number of human and mouse CRMs in each of six grammatical categories are given along with percentages of CRMs and background sequences within each category overlapping a DHS site(s), for the total dataset, orthologous CRMs, unmapped CRMs (gains and losses combined), species-specific gains and species-specific losses. Odds ratios and p-values were calculated using individual Fisher's Exact tests against matched background sequences. P-values were corrected for multiple testing with the holm method.

**Table S7.**

Percentage of CRMs and background sequences marked with active chromatin states from ChromHMM [27]. The number of human and mouse CRMs in each of six aggregate grammatical categories are given along with percentages of CRMs and background sequences within each category overlapping regions of the genome assigned to active states (states 1-5) by ChromHMM (see table S1), for the total dataset, orthologous CRMs, unmapped CRMs (gains and losses combined), species-specific gains and species-specific losses. Odds ratios and p-values were calculated using individual Fisher's Exact tests against matched background sequences. P-values were corrected for multiple testing with the holm method.

**Table S8.**

GWAS Ontology terms and associated functional classifications.

**Table S9.**

GWAS Ontology term enrichments found within human CRMs pooled across all grammatical patterns. For each term, observed counts were collected by counting the occurrences of each term among CRM-associated GWAS and GWAS-linked SNPs within the human dataset to compute the expected binomial frequency. Each term was counted only once per CRM in cases where a CRM contained multiple SNPs annotated with the same term. All terms in the total dataset with uncorrected p-values  $\leq 0.05$  are reported in the table but only those passing a 0.05 threshold after multiple testing correction by the FDR method were retained for further analysis. Immune terms are presented in red text.

**Table S10.**

GWAS Ontology term enrichments by aggregate grammatical class. CRMs were separated by aggregate grammatical class and binomial enrichment tests for each GWAS Ontology term was performed following the same procedures as for the pooled set. Terms presented in blue text were found only in the analysis of aggregate grammatical classes, but not in the pooled dataset. Immune terms are presented in red text.

**Table S11.**

GWAS Ontology term enrichments by individual grammatical class. CRMs were separated into individual grammatical classes and binomial enrichment tests for each GWAS Ontology term was performed following the same procedures as for the pooled set. Terms presented in blue text were found only in the analysis of individual grammatical classes, but not in the pooled dataset. Immune terms are presented in red text.

**Table S1**

| Accession   | Species | Cell    | TF      | Format     |
|-------------|---------|---------|---------|------------|
| ENCSR000ERC | Mouse   | CH12    | BHLHE40 | narrowPeak |
| ENCSR000DZJ | Human   | GM12878 | BHLHE40 | narrowPeak |
| ENCSR000EGV | Human   | K562    | BHLHE40 | narrowPeak |
| ENCSR000ESH | Mouse   | MEL     | BHLHE40 | narrowPeak |
| ENCSR000EQV | Mouse   | CH12    | CHD1    | narrowPeak |
| ENCSR000DZE | Human   | GM12878 | CHD1    | narrowPeak |
| ENCSR000AQD | Human   | K562    | CHD1    | narrowPeak |
| ENCSR000ESN | Mouse   | MEL     | CHD1    | narrowPeak |
| ENCSR000ERF | Mouse   | CH12    | CHD2    | narrowPeak |
| ENCSR000DZR | Human   | GM12878 | CHD2    | narrowPeak |
| ENCSR000EHD | Human   | K562    | CHD2    | narrowPeak |
| ENCSR000ETO | Mouse   | MEL     | CHD2    | narrowPeak |
| ENCSR000ERM | Mouse   | CH12    | CTCF    | narrowPeak |
| ENCSR000AKB | Human   | GM12878 | CTCF    | narrowPeak |
| ENCSR000BPJ | Human   | K562    | CTCF    | narrowPeak |
| ENCSR000ETE | Mouse   | MEL     | CTCF    | narrowPeak |
| ENCSR000ERU | Mouse   | CH12    | E2F4    | narrowPeak |
| ENCSR000DYY | Human   | GM12878 | E2F4    | narrowPeak |
| ENCSR000EWL | Human   | K562    | E2F4    | narrowPeak |
| ENCSR000ETY | Mouse   | MEL     | E2F4    | narrowPeak |
| ENCSR293WTN | Mouse   | CH12    | ELF1    | narrowPeak |
| ENCSR000BMB | Human   | GM12878 | ELF1    | narrowPeak |
| ENCSR000BMD | Human   | K562    | ELF1    | narrowPeak |
| ENCSR033OWC | Mouse   | MEL     | ELF1    | narrowPeak |
| ENCSR000ERI | Mouse   | CH12    | EP300   | narrowPeak |
| ENCSR000DZD | Human   | GM12878 | EP300   | narrowPeak |
| ENCSR000EGE | Human   | K562    | EP300   | narrowPeak |
| ENCSR000ETP | Mouse   | MEL     | EP300   | narrowPeak |
| ENCSR000ERA | Mouse   | CH12    | ETS1    | narrowPeak |
| ENCSR000BKA | Human   | GM12878 | ETS1    | narrowPeak |
| ENCSR000BKQ | Human   | K562    | ETS1    | narrowPeak |
| ENCSR000ETB | Mouse   | MEL     | ETS1    | narrowPeak |
| ENCSR000EQS | Mouse   | CH12    | GABPA   | narrowPeak |
| ENCSR000BGC | Human   | GM12878 | GABPA   | narrowPeak |
| ENCSR000BLO | Human   | K562    | GABPA   | narrowPeak |
| ENCSR000ESK | Mouse   | MEL     | GABPA   | narrowPeak |
| ENCSR000ERR | Mouse   | CH12    | JUND    | narrowPeak |
| ENCSR000EYV | Human   | GM12878 | JUND    | narrowPeak |
| ENCSR000EGN | Human   | K562    | JUND    | narrowPeak |
| ENCSR000ETZ | Mouse   | MEL     | JUND    | narrowPeak |
| ENCSR000ERB | Mouse   | CH12    | MAFK    | narrowPeak |
| ENCSR000DYV | Human   | GM12878 | MAFK    | narrowPeak |
| ENCSR000EGX | Human   | K562    | MAFK    | narrowPeak |
| ENCSR000ETK | Mouse   | MEL     | MAFK    | narrowPeak |
| ENCSR000ERL | Mouse   | CH12    | MAX     | narrowPeak |
| ENCSR000DZF | Human   | GM12878 | MAX     | narrowPeak |
| ENCSR000EFV | Human   | K562    | MAX     | narrowPeak |
| ENCSR000ETX | Mouse   | MEL     | MAX     | narrowPeak |
| ENCSR000EQT | Mouse   | CH12    | MAZ     | narrowPeak |
| ENCSR000DZA | Human   | GM12878 | MAZ     | narrowPeak |
| ENCSR000EFX | Human   | K562    | MAZ     | narrowPeak |
| ENCSR000ESL | Mouse   | MEL     | MAZ     | narrowPeak |
| ENCSR806JZK | Mouse   | CH12    | MEF2A   | narrowPeak |
| ENCSR000BKB | Human   | GM12878 | MEF2A   | narrowPeak |
| ENCSR000BNV | Human   | K562    | MEF2A   | narrowPeak |

| Accession   | Species | Cell    | TF              | Format     |
|-------------|---------|---------|-----------------|------------|
| ENCSR867SDZ | Mouse   | MEL     | MEF2A           | narrowPeak |
| ENCSR000ERE | Mouse   | CH12    | MXI1            | narrowPeak |
| ENCSR000DZI | Human   | GM12878 | MXI1            | narrowPeak |
| ENCSR000EGZ | Human   | K562    | MXI1            | narrowPeak |
| ENCSR000ETN | Mouse   | MEL     | MXI1            | narrowPeak |
| ENCSR000ERN | Mouse   | CH12    | MYC             | narrowPeak |
| ENCSR000DKU | Human   | GM12878 | MYC             | narrowPeak |
| ENCSR000FAZ | Human   | K562    | MYC             | narrowPeak |
| ENCSR000EUA | Mouse   | MEL     | MYC             | narrowPeak |
| ENCSR980YXJ | Mouse   | CH12    | NRF1            | narrowPeak |
| ENCSR000DZO | Human   | GM12878 | NRF1            | narrowPeak |
| ENCSR000EHH | Human   | K562    | NRF1            | narrowPeak |
| ENCSR135SWH | Mouse   | MEL     | NRF1            | narrowPeak |
| ENCSR000ERQ | Mouse   | CH12    | POLR2A          | narrowPeak |
| ENCSR000BGD | Human   | GM12878 | POLR2A          | narrowPeak |
| ENCSR000BMR | Human   | K562    | POLR2A          | narrowPeak |
| ENCSR000EUC | Mouse   | MEL     | POLR2A          | narrowPeak |
| ENCSR000ERH | Mouse   | CH12    | POLR2AphosphoS2 | narrowPeak |
| ENCSR000DZK | Human   | GM12878 | POLR2AphosphoS2 | narrowPeak |
| ENCSR000EGF | Human   | K562    | POLR2AphosphoS2 | narrowPeak |
| ENCSR000ETM | Mouse   | MEL     | POLR2AphosphoS2 | narrowPeak |
| ENCSR000ERK | Mouse   | CH12    | RAD21           | narrowPeak |
| ENCSR000BMY | Human   | GM12878 | RAD21           | narrowPeak |
| ENCSR000BKV | Human   | K562    | RAD21           | narrowPeak |
| ENCSR000ETS | Mouse   | MEL     | RAD21           | narrowPeak |
| ENCSR000EQZ | Mouse   | CH12    | RCOR1           | narrowPeak |
| ENCSR000DZC | Human   | GM12878 | RCOR1           | narrowPeak |
| ENCSR000EGG | Human   | K562    | RCOR1           | narrowPeak |
| ENCSR000ESI | Mouse   | MEL     | RCOR1           | narrowPeak |
| ENCSR000EQY | Mouse   | CH12    | SIN3A           | narrowPeak |
| ENCSR000DYX | Human   | GM12878 | SIN3A           | narrowPeak |
| ENCSR000BLR | Human   | K562    | SIN3A           | narrowPeak |
| ENCSR000ETC | Mouse   | MEL     | SIN3A           | narrowPeak |
| ENCSR000ERG | Mouse   | CH12    | SMC3            | narrowPeak |
| ENCSR000DZP | Human   | GM12878 | SMC3            | narrowPeak |
| ENCSR000EGW | Human   | K562    | SMC3            | narrowPeak |
| ENCSR000ETL | Mouse   | MEL     | SMC3            | narrowPeak |
| ENCSR000ERP | Mouse   | CH12    | TBP             | narrowPeak |
| ENCSR000DZZ | Human   | GM12878 | TBP             | narrowPeak |
| ENCSR000EHA | Human   | K562    | TBP             | narrowPeak |
| ENCSR000EUB | Mouse   | MEL     | TBP             | narrowPeak |
| ENCSR973SOG | Mouse   | CH12    | USF1            | narrowPeak |
| ENCSR000BGI | Human   | GM12878 | USF1            | narrowPeak |
| ENCSR000BKT | Human   | K562    | USF1            | narrowPeak |
| ENCSR705HGT | Mouse   | MEL     | USF1            | narrowPeak |
| ENCSR000ERJ | Mouse   | CH12    | USF2            | narrowPeak |
| ENCSR000DZU | Human   | GM12878 | USF2            | narrowPeak |
| ENCSR000EHG | Human   | K562    | USF2            | narrowPeak |
| ENCSR000ETF | Mouse   | MEL     | USF2            | narrowPeak |
| ENCSR000EQO | Mouse   | CH12    | ZNF384          | narrowPeak |
| ENCSR000DYP | Human   | GM12878 | ZNF384          | narrowPeak |
| ENCSR000EFP | Human   | K562    | ZNF384          | narrowPeak |
| ENCSR000ESD | Mouse   | MEL     | ZNF384          | narrowPeak |

**Table S2**

| Accession  | Species | Cell    | format |
|------------|---------|---------|--------|
| ENCF012OHJ | hg19    | K562    | bigBed |
| ENCF836FGC | mm9     | MEL     | bigBed |
| ENCF930VWI | hg19    | GM12878 | bigBed |
| ENCF473FWY | mm9     | CH12    | bigBed |

**Table S3**

| Accession  | Species | Cell    | Type    | Format |
|------------|---------|---------|---------|--------|
| ENCF001YNS | mm9     | CH12    | Hotspot | bed    |
| ENCF001YNT | mm9     | CH12    | Hotspot | bed    |
| ENCF001WBD | hg19    | K562    | Hotspot | bed    |
| ENCF001WNM | hg19    | K562    | Hotspot | bed    |
| ENCF001WNL | hg19    | K562    | Hotspot | bed    |
| ENCF001WFR | hg19    | GM12878 | Hotspot | bed    |
| ENCF001WFS | hg19    | GM12878 | Hotspot | bed    |
| ENCF001YRV | mm9     | MEL     | Hotspot | bed    |
| ENCF001YRW | mm9     | MEL     | Hotspot | bed    |
| ENCF001YLI | mm9     | MEL     | Hotspot | bed    |
| ENCF001YRU | mm9     | MEL     | Hotspot | bed    |

**Table S4**

| Accession  | Species | Cell    | format | Lab      | Sequencer                               |
|------------|---------|---------|--------|----------|-----------------------------------------|
| ENCF001MFQ | mm9     | CH12    | fastq  | Hardison | Illumina Genome Analyzer Iix            |
| ENCF001MFP | mm9     | CH12    | fastq  | Hardison | Illumina Genome Analyzer Iix            |
| ENCF001MKT | mm9     | MEL     | fastq  | Hardison | HiSeq 2000                              |
| ENCF001MKV | mm9     | MEL     | fastq  | Hardison | HiSeq 2001                              |
| ENCF000DWH | hg19    | K562    | fastq  | Wold     | Illumina Genome Analyzer (GAI or GAIix) |
| ENCF000DVT | hg19    | K562    | fastq  | Wold     | Illumina Genome Analyzer (GAI or GAIix) |
| ENCF000CXI | hg19    | GM12878 | fastq  | Wold     | Illumina Genome Analyzer II             |
| ENCF000CXH | hg19    | GM12878 | fastq  | Wold     | Illumina Genome Analyzer II             |





Table S7

| Aggregate Grammatical Class | CRMs             | ACS All |          |            |                   | ACS Orth |          |            |                   | ACS Nonorth |          |            |                   | ACS Gain  |          |            |                   | ACS Loss  |          |            |                   |           |
|-----------------------------|------------------|---------|----------|------------|-------------------|----------|----------|------------|-------------------|-------------|----------|------------|-------------------|-----------|----------|------------|-------------------|-----------|----------|------------|-------------------|-----------|
|                             |                  | % ACS   | % ACS BG | Odds Ratio | Corrected P-Value | %ACS     | % ACS BG | Odds Ratio | Corrected P-Value | %ACS        | % ACS BG | Odds Ratio | Corrected P-Value | %ACS      | % ACS BG | Odds Ratio | Corrected P-Value | %ACS      | % ACS BG | Odds Ratio | Corrected P-Value |           |
| Mouse                       | Lineage-Specific | 3219    | 77.20%   | 25.62%     | 9.82              | < 2E-272 | 80.65%   | 28.94%     | 10.23             | < 2E-272    | 61.71%   | 18.70%     | 6.99              | 7.42E-30  | 59.08%   | 21.00%     | 5.42              | 2.71E-20  | 76.77%   | 3.33%      | 92.18             | 6.83E-13  |
|                             | Mouse-Specific   | 13385   | 88.03%   | 27.70%     | 19.19             | < 2E-272 | 89.65%   | 31.15%     | 19.15             | < 2E-272    | 80.05%   | 19.59%     | 16.45             | 2.46E-186 | 78.74%   | 19.97%     | 14.83             | 3.13E-148 | 87.11%   | 17.48%     | 31.52             | 2.51E-40  |
|                             | Human-Specific   | 138     | 65.22%   | 35.19%     | 3.44              | 3.35E-06 | 66.00%   | 40.51%     | 2.83              | 3.35E-06    | 60.00%   | 0.00%      | Inf               | 7.99E-03  | 65.38%   | 0.00%      | Inf               | 5.52E-03  | 25.00%   | 0.00%      | Inf               | 1         |
|                             | Two-Cell Mixed   | 2445    | 94.97%   | 32.22%     | 39.65             | < 2E-272 | 95.82%   | 35.51%     | 41.56             | < 2E-272    | 88.28%   | 24.42%     | 22.98             | 8.96E-29  | 87.28%   | 27.94%     | 17.43             | 1.04E-19  | 91.94%   | 11.11%     | 80.34             | 3.96E-10  |
|                             | Three-Cell       | 13876   | 88.41%   | 29.80%     | 17.97             | < 2E-272 | 89.65%   | 31.94%     | 18.46             | < 2E-272    | 77.44%   | 24.83%     | 10.38             | 1.04E-93  | 76.40%   | 25.80%     | 9.29              | 9.84E-73  | 82.48%   | 19.40%     | 19.34             | 3.49E-22  |
| MCKG                        | 91992            | 33.11%  | 25.18%   | 1.47       | 2.35E-272         | 37.03%   | 28.35%   | 1.49       | 2.35E-272         | 22.44%      | 19.91%   | 1.16       | 1.51E-06          | 21.56%    | 19.84%   | 1.11       | 2.56E-03          | 30.32%    | 20.57%   | 1.68       | 6.76E-08          |           |
| Human                       | Lineage-Specific | 3356    | 92.73%   | 28.56%     | 31.89             | < 2E-272 | 93.22%   | 33.05%     | 27.81             | < 2E-272    | 90.98%   | 20.19%     | 39.67             | 6.94E-120 | 87.66%   | 18.98%     | 29.95             | 5.06E-45  | 93.06%   | 21.08%     | 49.56             | 1.55E-75  |
|                             | Mouse-Specific   | 176     | 95.45%   | 32.28%     | 43.38             | 4.31E-37 | 94.44%   | 35.42%     | 30.36             | 4.31E-37    | 97.92%   | 21.43%     | 138.15            | 2.44E-08  | 100.00%  | 25.00%     | Inf               | 7.58E-05  | 95.65%   | 16.67%     | 69.96             | 5.85E-04  |
|                             | Human-Specific   | 8565    | 96.12%   | 36.90%     | 42.37             | < 2E-272 | 96.55%   | 41.12%     | 40.00             | < 2E-272    | 94.31%   | 27.48%     | 43.60             | 3.24E-186 | 93.82%   | 25.82%     | 43.13             | 8.34E-72  | 94.62%   | 28.48%     | 43.90             | 5.22E-115 |
|                             | Two-Cell Mixed   | 6287    | 91.55%   | 33.78%     | 21.24             | < 2E-272 | 92.48%   | 37.65%     | 20.37             | < 2E-272    | 88.04%   | 25.37%     | 21.59             | 1.40E-137 | 87.78%   | 27.42%     | 18.89             | 5.61E-52  | 88.23%   | 24.04%     | 23.55             | 4.05E-86  |
|                             | Three-Cell       | 12687   | 90.95%   | 34.89%     | 18.76             | < 2E-272 | 91.65%   | 39.36%     | 16.91             | < 2E-272    | 87.77%   | 23.85%     | 22.88             | 2.31E-230 | 88.84%   | 23.74%     | 25.44             | 2.33E-92  | 87.09%   | 23.91%     | 21.41             | 1.20E-138 |
| MCKG                        | 53642            | 37.48%  | 28.19%   | 1.53       | 1.42E-212         | 39.59%   | 32.61%   | 1.35       | 1.42E-212         | 31.74%      | 23.62%   | 1.50       | 4.34E-29          | 28.35%    | 22.21%   | 1.39       | 3.51E-07          | 33.72%    | 24.44%   | 1.57       | 3.04E-23          |           |
| All                         | Total            | 209768  | 51.63%   | 27.84%     | 2.77              | < 2E-272 | 55.86%   | 31.46%     | 2.76              | < 2E-272    | 38.03%   | 21.72%     | 2.21              | < 2E-272  | 33.46%   | 20.81%     | 1.91              | 2.47E-154 | 48.56%   | 23.57%     | 3.06              | 1.49E-248 |
|                             | Total.hg19       | 84713   | 44.91%   | 27.69%     | 2.13              | < 2E-272 | 48.99%   | 31.42%     | 2.10              | < 2E-272    | 33.58%   | 21.76%     | 1.82              | 8.23E-180 | 27.56%   | 20.64%     | 1.46              | 1.95E-45  | 46.47%   | 23.89%     | 2.77              | 1.68E-196 |
|                             | Total.mm9        | 125055  | 47.50%   | 26.10%     | 2.56              | < 2E-272 | 52.47%   | 29.28%     | 2.67              | < 2E-272    | 31.36%   | 20.11%     | 1.82              | 5.40E-109 | 29.87%   | 20.17%     | 1.69              | 8.48E-74  | 43.40%   | 19.53%     | 3.16              | 3.75E-47  |

**Table S8**

| #GWAS Ontology Term                          | Category           |
|----------------------------------------------|--------------------|
| aggressive behavior                          | behavior           |
| alcohol dependence                           | behavior           |
| alcohol drinking                             | behavior           |
| behavior or behavioral disorder measurement  | behavior           |
| coffee consumption                           | behavior           |
| cups of coffee per day measurement           | behavior           |
| illegal drug consumption                     | behavior           |
| nicotine use                                 | behavior           |
| non-substance related disinhibited behaviour | behavior           |
| smoking behavior                             | behavior           |
| smoking behaviour measurement                | behavior           |
| smoking cessation                            | behavior           |
| smoking initiation                           | behavior           |
| aging                                        | biological_process |
| energy expenditure                           | biological_process |
| energy intake                                | biological_process |
| physical activity                            | biological_process |
| sneezing                                     | biological_process |
| albumin:globulin ratio measurement           | blood              |
| alpha globulin measurement                   | blood              |
| blood metabolite measurement                 | blood              |
| blood sedimentation                          | blood              |
| coagulation factor measurement               | blood              |
| erythrocyte count                            | blood              |
| erythrocyte measurement                      | blood              |
| factor VIII measurement                      | blood              |
| fetal hemoglobin measurement                 | blood              |
| fibrinogen measurement                       | blood              |
| hematocrit                                   | blood              |
| hematological measurement                    | blood              |
| hemoglobin A2 measurement                    | blood              |
| hemoglobin E disease                         | blood              |
| hemoglobin measurement                       | blood              |
| mean corpuscular hemoglobin                  | blood              |
| mean corpuscular hemoglobin concentration    | blood              |
| mean corpuscular volume                      | blood              |
| mean platelet volume                         | blood              |
| partial thromboplastin time                  | blood              |
| platelet aggregation                         | blood              |
| platelet count                               | blood              |
| protein c measurement                        | blood              |
| red blood cell distribution width            | blood              |
| sickle cell anemia                           | blood              |
| total blood protein measurement              | blood              |
| von Willebrand factor measurement            | blood              |
| ankle brachial index                         | body_measurement   |
| anthropometry                                | body_measurement   |
| arm span                                     | body_measurement   |
| Attached earlobe                             | body_measurement   |
| axial length measurement                     | body_measurement   |
| birth weight                                 | body_measurement   |
| body composition measurement                 | body_measurement   |
| body fat distribution                        | body_measurement   |
| body height                                  | body_measurement   |
| body mass index                              | body_measurement   |
| body weight                                  | body_measurement   |
| dense area measurement                       | body_measurement   |
| foot                                         | body_measurement   |
| head circumference                           | body_measurement   |
| height growth measurement                    | body_measurement   |
| height-adjusted body mass index              | body_measurement   |
| hip bone size                                | body_measurement   |
| hip circumference                            | body_measurement   |
| hip geometry                                 | body_measurement   |
| infant body height                           | body_measurement   |
| infant head circumference                    | body_measurement   |
| intracranial volume                          | body_measurement   |
| lean body mass                               | body_measurement   |
| mammographic density measurement             | body_measurement   |
| mammographic density percentage              | body_measurement   |
| metabolic rate measurement                   | body_measurement   |
| non-dense area measurement                   | body_measurement   |
| spine bone size                              | body_measurement   |
| subcutaneous adipose tissue measurement      | body_measurement   |
| visceral adipose tissue measurement          | body_measurement   |

| #GWAS Ontology Term                                   | Category         |
|-------------------------------------------------------|------------------|
| waist circumference                                   | body_measurement |
| waist-hip ratio                                       | body_measurement |
| bone density                                          | bone             |
| braces                                                | bone             |
| osteitis deformans                                    | bone             |
| scoliosis                                             | bone             |
| alpha peak frequency measurement                      | brain            |
| alpha wave measurement                                | brain            |
| beta wave measurement                                 | brain            |
| brain measurement                                     | brain            |
| brain serotonin transporter measurement               | brain            |
| cognition                                             | brain            |
| cortical thickness                                    | brain            |
| delta wave measurement                                | brain            |
| electroencephalogram measurement                      | brain            |
| frontal theta oscillation measurement                 | brain            |
| Heschl's gyrus morphology measurement                 | brain            |
| hippocampal volume                                    | brain            |
| information processing speed                          | brain            |
| intelligence                                          | brain            |
| lentiform nucleus volume                              | brain            |
| mathematical ability                                  | brain            |
| memory performance                                    | brain            |
| memory, short-term                                    | brain            |
| mental process                                        | brain            |
| neurofibrillary tangles measurement                   | brain            |
| paragraph delayed recall measurement                  | brain            |
| reasoning                                             | brain            |
| self reported educational attainment                  | brain            |
| superior frontal gyrus grey matter volume measurement | brain            |
| theta wave measurement                                | brain            |
| volumetric brain mri                                  | brain            |
| white matter integrity                                | brain            |
| white matter microstructure measurement               | brain            |
| word list delayed recall measurement                  | brain            |
| word reading                                          | brain            |
| Alzheimer's disease neuropathologic change            | brain_disease    |
| Alzheimer's disease                                   | brain_disease    |
| anorexia nervosa                                      | brain_disease    |
| anxiety                                               | brain_disease    |
| anxiety disorder                                      | brain_disease    |
| asperger syndrome                                     | brain_disease    |
| attention deficit hyperactivity disorder              | brain_disease    |
| autism                                                | brain_disease    |
| autism spectrum disorder                              | brain_disease    |
| autism spectrum disorder symptom                      | brain_disease    |
| bipolar disorder                                      | brain_disease    |
| bulimia nervosa                                       | brain_disease    |
| conduct disorder                                      | brain_disease    |
| dementia                                              | brain_disease    |
| drug dependence                                       | brain_disease    |
| dyslexia                                              | brain_disease    |
| eating disorder                                       | brain_disease    |
| epilepsy                                              | brain_disease    |
| hippocampal atrophy                                   | brain_disease    |
| HVA measurement                                       | brain_disease    |
| insomnia                                              | brain_disease    |
| language impairment                                   | brain_disease    |
| Lewy body dementia                                    | brain_disease    |
| Lewy body dementia measurement                        | brain_disease    |
| mental or behavioural disorder                        | brain_disease    |
| MHPG measurement                                      | brain_disease    |
| migraine disorder                                     | brain_disease    |
| migraine with aura                                    | brain_disease    |
| migraine without aura                                 | brain_disease    |
| mood disorder                                         | brain_disease    |
| narcolepsy                                            | brain_disease    |
| neuritic plaque measurement                           | brain_disease    |
| neuropsychological test                               | brain_disease    |
| nicotine dependence                                   | brain_disease    |
| p-tau measurement                                     | brain_disease    |
| panic disorder                                        | brain_disease    |
| parkinson's disease                                   | brain_disease    |
| plasma beta-amyloid 1-40 measurement                  | brain_disease    |
| plasma beta-amyloid 1-42 measurement                  | brain_disease    |
| post-traumatic stress disorder                        | brain_disease    |

| #GWAS Ontology Term                        | Category       |
|--------------------------------------------|----------------|
| progressive supranuclear palsy             | brain_disease  |
| psychosis                                  | brain_disease  |
| psychotic symptoms                         | brain_disease  |
| schizoaffective disorder                   | brain_disease  |
| schizophrenia                              | brain_disease  |
| social communication impairment            | brain_disease  |
| suicidal ideation                          | brain_disease  |
| unipolar depression                        | brain_disease  |
| acute lymphoblastic leukemia               | cancer         |
| B-cell acute lymphoblastic leukemia        | cancer         |
| bladder carcinoma                          | cancer         |
| breast carcinoma                           | cancer         |
| cancer biomarker measurement               | cancer         |
| central nervous system cancer              | cancer         |
| cervical carcinoma                         | cancer         |
| chronic lymphocytic leukemia               | cancer         |
| colorectal cancer                          | cancer         |
| diffuse large b-cell lymphoma              | cancer         |
| Esophageal adenocarcinoma                  | cancer         |
| esophageal carcinoma                       | cancer         |
| esophageal squamous cell carcinoma         | cancer         |
| gastric carcinoma                          | cancer         |
| hepatocellular carcinoma                   | cancer         |
| hodgkins lymphoma                          | cancer         |
| igfbp-3 measurement                        | cancer         |
| lung adenocarcinoma                        | cancer         |
| lung carcinoma                             | cancer         |
| lymphoma                                   | cancer         |
| malignant epithelial tumor of ovary        | cancer         |
| marginal zone B-cell lymphoma              | cancer         |
| melanoma                                   | cancer         |
| multiple myeloma                           | cancer         |
| neoplasm of mature b-cells                 | cancer         |
| nephroblastoma                             | cancer         |
| neuroblastoma                              | cancer         |
| nevus                                      | cancer         |
| nodular sclerosis Hodgkin lymphoma         | cancer         |
| non-small cell lung carcinoma              | cancer         |
| osteosarcoma                               | cancer         |
| ovarian carcinoma                          | cancer         |
| pancreatic carcinoma                       | cancer         |
| prostate carcinoma                         | cancer         |
| prostate specific antigen measurement      | cancer         |
| renal cell carcinoma                       | cancer         |
| serum carcinoembryonic antigen measurement | cancer         |
| squamous cell carcinoma                    | cancer         |
| testicular carcinoma                       | cancer         |
| triple-negative breast cancer              | cancer         |
| abdominal aortic artery calcification      | cardiovascular |
| aortic root size                           | cardiovascular |
| asymmetrical dimethylarginine measurement  | cardiovascular |
| atrial fibrillation                        | cardiovascular |
| blood pressure                             | cardiovascular |
| brain aneurysm                             | cardiovascular |
| Brugada syndrome                           | cardiovascular |
| cardiac hypertrophy                        | cardiovascular |
| cardiac troponin T measurement             | cardiovascular |
| cardiovascular disease                     | cardiovascular |
| cardiovascular measurement                 | cardiovascular |
| carotid artery disease                     | cardiovascular |
| cis/trans-18:2 fatty acid measurement      | cardiovascular |
| common carotid intimal medial thickness    | cardiovascular |
| conotruncal heart defect                   | cardiovascular |
| coronary artery calcification              | cardiovascular |
| coronary heart disease                     | cardiovascular |
| creatine kinase measurement                | cardiovascular |
| diastolic blood pressure                   | cardiovascular |
| dihydroxy docosatrienoic acid measurement  | cardiovascular |
| ejection fraction measurement              | cardiovascular |
| electrocardiography                        | cardiovascular |
| exercise test                              | cardiovascular |
| heart failure                              | cardiovascular |
| heart function measurement                 | cardiovascular |
| heart rate                                 | cardiovascular |
| Hydroxy-leucine measurement                | cardiovascular |
| hypertension                               | cardiovascular |

| #GWAS Ontology Term                                   | Category            |
|-------------------------------------------------------|---------------------|
| icam-1 measurement                                    | cardiovascular      |
| internal carotid intimal medial thickness             | cardiovascular      |
| large artery stroke                                   | cardiovascular      |
| lipoprotein-associated phospholipase a(2) measurement | cardiovascular      |
| myeloperoxidase measurement                           | cardiovascular      |
| myocardial infarction                                 | cardiovascular      |
| nt-probnp measurement                                 | cardiovascular      |
| P wave duration                                       | cardiovascular      |
| pr interval                                           | cardiovascular      |
| PR segment                                            | cardiovascular      |
| pulmonary artery enlargement                          | cardiovascular      |
| pulmonary function measurement                        | cardiovascular      |
| pyroglutamine measurement                             | cardiovascular      |
| QRS complex                                           | cardiovascular      |
| QRS duration                                          | cardiovascular      |
| qt interval                                           | cardiovascular      |
| resting heart rate                                    | cardiovascular      |
| rr interval                                           | cardiovascular      |
| serum homoarginine measurement                        | cardiovascular      |
| serum ST2 measurement                                 | cardiovascular      |
| soluble p-selectin measurement                        | cardiovascular      |
| stroke                                                | cardiovascular      |
| sudden cardiac arrest                                 | cardiovascular      |
| systolic blood pressure                               | cardiovascular      |
| tissue plasminogen activator measurement              | cardiovascular      |
| total trans-18:1 fatty acid measurement               | cardiovascular      |
| trans fatty acid measurement                          | cardiovascular      |
| trans-16:1n-7 fatty acid measurement                  | cardiovascular      |
| trans/cis-18:2 fatty acid measurement                 | cardiovascular      |
| trans/trans-18:2 fatty acid measurement               | cardiovascular      |
| triglyceride measurement                              | cardiovascular      |
| uric acid measurement                                 | cardiovascular      |
| venous thromboembolism                                | cardiovascular      |
| androgenetic alopecia                                 | common_traits       |
| eye color                                             | common_traits       |
| hair color                                            | common_traits       |
| hair morphology                                       | common_traits       |
| personality                                           | common_traits       |
| personality trait                                     | common_traits       |
| temperament and character inventory                   | common_traits       |
| dental caries                                         | dental              |
| molar-incisor hypomineralization                      | dental              |
| odontogenesis                                         | dental              |
| periodontitis                                         | dental              |
| pit and fissure surface dental caries                 | dental              |
| smooth surface dental caries                          | dental              |
| tooth agenesis                                        | dental              |
| tooth eruption                                        | dental              |
| neonate                                               | developmental_stage |
| a1c measurement                                       | diabetes            |
| acute insulin response measurement                    | diabetes            |
| disposition index measurement                         | diabetes            |
| fasting blood glucose measurement                     | diabetes            |
| fasting blood insulin measurement                     | diabetes            |
| glucose effectiveness measurement                     | diabetes            |
| glucose homeostasis measurement                       | diabetes            |
| HOMA-IR                                               | diabetes            |
| insulin metabolic clearance rate measurement          | diabetes            |
| insulin resistance                                    | diabetes            |
| insulin sensitivity measurement                       | diabetes            |
| resistin measurement                                  | diabetes            |
| type 1 diabetes nephropathy                           | diabetes            |
| type ii diabetes mellitus                             | diabetes            |
| aspirin induced asthma                                | drug_response       |
| chemotherapy-induced hypertension                     | drug_response       |
| cumulative dose response to bevacizumab               | drug_response       |
| drug-induced agranulocytosis                          | drug_response       |
| drug-induced liver injury                             | drug_response       |
| response to anticoagulant                             | drug_response       |
| response to anticonvulsant                            | drug_response       |
| response to antidepressant                            | drug_response       |
| response to antimicrotubule agent                     | drug_response       |
| response to antineoplastic agent                      | drug_response       |
| response to antipsychotic drug                        | drug_response       |
| response to bevacizumab                               | drug_response       |
| response to bronchodilator                            | drug_response       |

| #GWAS Ontology Term                                | Category            |
|----------------------------------------------------|---------------------|
| response to candesartan                            | drug_response       |
| response to carboplatin                            | drug_response       |
| response to clozapine                              | drug_response       |
| response to corticosteroid                         | drug_response       |
| response to cyclophosphamide                       | drug_response       |
| response to cytosine arabinoside                   | drug_response       |
| response to docetaxel                              | drug_response       |
| response to drug                                   | drug_response       |
| response to efavirenz                              | drug_response       |
| response to etoposide                              | drug_response       |
| response to fenofibrate                            | drug_response       |
| response to gemcitabine                            | drug_response       |
| response to haloperidol                            | drug_response       |
| response to hydrochlorothiazide                    | drug_response       |
| response to interferon beta                        | drug_response       |
| response to irinotecan                             | drug_response       |
| response to methotrexate                           | drug_response       |
| response to methylphenidate                        | drug_response       |
| response to paclitaxel                             | drug_response       |
| response to platinum based chemotherapy            | drug_response       |
| response to reverse transcriptase inhibitor        | drug_response       |
| response to selective serotonin reuptake inhibitor | drug_response       |
| response to statin                                 | drug_response       |
| response to vitamin                                | drug_response       |
| Abnormality of refraction                          | eye                 |
| age-related cataract                               | eye                 |
| age-related macular degeneration                   | eye                 |
| Astigmatism                                        | eye                 |
| contrast sensitivity measurement                   | eye                 |
| corneal topography                                 | eye                 |
| diabetic retinopathy                               | eye                 |
| exfoliation syndrome                               | eye                 |
| eye measurement                                    | eye                 |
| hypermetropia                                      | eye                 |
| intraocular pressure measurement                   | eye                 |
| Myopia                                             | eye                 |
| open-angle glaucoma                                | eye                 |
| optic disc size measurement                        | eye                 |
| pathological myopia                                | eye                 |
| retinopathy                                        | eye                 |
| rhegmatogenous retinal detachment                  | eye                 |
| Barrett's esophagus                                | gut                 |
| celiac disease                                     | gut                 |
| Hirschsprung disease                               | gut                 |
| sclerosing cholangitis                             | gut                 |
| cortisol secretion measurement                     | hormone_measurement |
| estradiol measurement                              | hormone_measurement |
| hormone measurement                                | hormone_measurement |
| insulin measurement                                | hormone_measurement |
| leptin measurement                                 | hormone_measurement |
| leptin receptor measurement                        | hormone_measurement |
| parathyroid hormone measurement                    | hormone_measurement |
| sex hormone globulin binding measurement           | hormone_measurement |
| thyroid stimulating hormone measurement            | hormone_measurement |
| thyroxine measurement                              | hormone_measurement |
| acne                                               | immune_system       |
| aids                                               | immune_system       |
| allergic sensitization measurement                 | immune_system       |
| allergy                                            | immune_system       |
| alloimmunization                                   | immune_system       |
| alopecia areata                                    | immune_system       |
| ankylosing spondylitis                             | immune_system       |
| anti-Heliobacter pylori serum IgG measurement      | immune_system       |
| anti-neutrophil antibody associated vasculitis     | immune_system       |
| antibody measurement                               | immune_system       |
| antiphospholipid antibody measurement              | immune_system       |
| atopic eczema                                      | immune_system       |
| atopy                                              | immune_system       |
| autoantibody measurement                           | immune_system       |
| autoimmune hepatitis type 1                        | immune_system       |
| Behcet's disease                                   | immune_system       |
| ccl2 measurement                                   | immune_system       |
| CCL4 measurement                                   | immune_system       |
| CCL5 measurement                                   | immune_system       |
| chronic childhood arthritis                        | immune_system       |
| chronic hepatitis B infection                      | immune_system       |

| #GWAS Ontology Term                           | Category                 |
|-----------------------------------------------|--------------------------|
| chronic hepatitis C infection                 | immune_system            |
| complement C3 measurement                     | immune_system            |
| complement C4 measurement                     | immune_system            |
| crohn's disease                               | immune_system            |
| eosinophil count                              | immune_system            |
| eosinophilic esophagitis                      | immune_system            |
| Epstein-Barr virus infection                  | immune_system            |
| graves disease                                | immune_system            |
| hepatitis B infection                         | immune_system            |
| HIV viral set point measurement               | immune_system            |
| HIV-1 infection                               | immune_system            |
| iga glomerulonephritis                        | immune_system            |
| IgF-1 measurement                             | immune_system            |
| immune system disease                         | immune_system            |
| inflammatory bowel disease                    | immune_system            |
| interleukin 1 receptor antagonist measurement | immune_system            |
| interleukin 12 measurement                    | immune_system            |
| interleukin 18 measurement                    | immune_system            |
| interleukin-1 beta measurement                | immune_system            |
| interleukin-6 measurement                     | immune_system            |
| interleukin-6 receptor measurement            | immune_system            |
| interleukin-8 measurement                     | immune_system            |
| irritable bowel syndrome                      | immune_system            |
| leukocyte count                               | immune_system            |
| malaria                                       | immune_system            |
| monocyte count                                | immune_system            |
| monocyte early outgrowth colony forming unit  | immune_system            |
| multiple sclerosis                            | immune_system            |
| neutrophil count                              | immune_system            |
| osteoarthritis                                | immune_system            |
| parasitemia measurement                       | immune_system            |
| psoriasis                                     | immune_system            |
| pyoderma gangrenosum                          | immune_system            |
| response to dietary antigen                   | immune_system            |
| response to vaccine                           | immune_system            |
| response to virus                             | immune_system            |
| rheumatoid arthritis                          | immune_system            |
| seasonal allergic rhinitis                    | immune_system            |
| serum IgE measurement                         | immune_system            |
| serum IgG glycosylation measurement           | immune_system            |
| serum IgG measurement                         | immune_system            |
| serum IgM measurement                         | immune_system            |
| Sjogren syndrome                              | immune_system            |
| Staphylococcus aureus infection               | immune_system            |
| systemic lupus erythematosus                  | immune_system            |
| systemic scleroderma                          | immune_system            |
| thyroid peroxidase antibody measurement       | immune_system            |
| Trypanosoma cruzi seropositivity              | immune_system            |
| tuberculosis                                  | immune_system            |
| type 1 diabetes mellitus                      | immune_system            |
| ulcerative colitis                            | immune_system            |
| virologic response measurement                | immune_system            |
| vitiligo                                      | immune_system            |
| apolipoprotein a 1 measurement                | inflammatory_measurement |
| c-reactive protein measurement                | inflammatory_measurement |
| cytokine measurement                          | inflammatory_measurement |
| interleukin 10 measurement                    | inflammatory_measurement |
| lactate dehydrogenase measurement             | inflammatory_measurement |
| serum amyloid a protein measurement           | inflammatory_measurement |
| transforming growth factor beta measurement   | inflammatory_measurement |
| tumor necrosis factor-alpha measurement       | inflammatory_measurement |
| yk140 measurement                             | inflammatory_measurement |
| alpha macroglobulin measurement               | kidney                   |
| blood urea nitrogen measurement               | kidney                   |
| chronic kidney disease                        | kidney                   |
| diabetic nephropathy                          | kidney                   |
| kidney disease                                | kidney                   |
| membranous glomerulonephritis                 | kidney                   |
| nephrotic syndrome                            | kidney                   |
| renal system measurement                      | kidney                   |
| serum creatinine measurement                  | kidney                   |
| alkaline phosphatase measurement              | liver                    |
| aspartate aminotransferase measurement        | liver                    |
| biliary atresia                               | liver                    |
| biliary liver cirrhosis                       | liver                    |
| bilirubin measurement                         | liver                    |



| #GWAS Ontology Term                              | Category          |
|--------------------------------------------------|-------------------|
| butyrylcholinesterase measurement                | liver             |
| hepatitis C induced liver cirrhosis              | liver             |
| liver enzyme measurement                         | liver             |
| non-alcoholic fatty liver disease                | liver             |
| serum alanine aminotransferase measurement       | liver             |
| serum albumin measurement                        | liver             |
| serum gamma-glutamyl transferase measurement     | liver             |
| airway responsiveness measurement                | lung              |
| airway wall thickness measurement                | lung              |
| asthma                                           | lung              |
| bronchopulmonary dysplasia                       | lung              |
| CC16 measurement                                 | lung              |
| childhood onset asthma                           | lung              |
| chronic bronchitis                               | lung              |
| chronic obstructive pulmonary disease            | lung              |
| cystic fibrosis                                  | lung              |
| emphysema                                        | lung              |
| fev/fec ratio                                    | lung              |
| forced expiratory volume                         | lung              |
| idiopathic pulmonary fibrosis                    | lung              |
| interstitial lung disease                        | lung              |
| maximal midexpiratory flow rate                  | lung              |
| maximal oxygen uptake measurement                | lung              |
| surfactant protein D measurement                 | lung              |
| vital capacity                                   | lung              |
| 5-HIAA measurement                               | nervous_system    |
| age-related hearing impairment                   | nervous_system    |
| amyotrophic lateral sclerosis                    | nervous_system    |
| circadian rhythm                                 | nervous_system    |
| febrile seizures                                 | nervous_system    |
| MMR-related febrile seizures                     | nervous_system    |
| sensory perception of smell                      | nervous_system    |
| sensory perception of taste                      | nervous_system    |
| sporadic amyotrophic lateral sclerosis           | nervous_system    |
| cleft lip                                        | other_disease     |
| dupuytren contracture                            | other_disease     |
| leprosy                                          | other_disease     |
| lumbar disc degeneration                         | other_disease     |
| mucocutaneous lymph node syndrome                | other_disease     |
| orofacial clefting syndrome                      | other_disease     |
| pancreatitis                                     | other_disease     |
| prion disease                                    | other_disease     |
| sarcoidosis                                      | other_disease     |
| stevens-johnson syndrome                         | other_disease     |
| adhesion molecule measurement                    | other_measurement |
| adiponectin measurement                          | other_measurement |
| age at onset                                     | other_measurement |
| amino acid measurement                           | other_measurement |
| antioxidant measurement                          | other_measurement |
| antisaccade response measurement                 | other_measurement |
| arachidonic acid measurement                     | other_measurement |
| asbestos exposure measurement                    | other_measurement |
| beta-2 microglobulin measurement                 | other_measurement |
| calcium measurement                              | other_measurement |
| cotinine glucuronidation measurement             | other_measurement |
| DNA methylation                                  | other_measurement |
| docosapentaenoic acid measurement                | other_measurement |
| economic and social preference                   | other_measurement |
| electrodermal activity measurement               | other_measurement |
| event free survival time                         | other_measurement |
| fatty acid measurement                           | other_measurement |
| ferritin measurement                             | other_measurement |
| folic acid measurement                           | other_measurement |
| fructose-bisphosphate aldolase measurement       | other_measurement |
| functional laterality                            | other_measurement |
| genetic variation                                | other_measurement |
| glycoprotein measurement                         | other_measurement |
| high density lipoprotein cholesterol measurement | other_measurement |
| homocysteine measurement                         | other_measurement |
| IGFBP-1 measurement                              | other_measurement |
| insulin like growth factor measurement           | other_measurement |
| iron biomarker measurement                       | other_measurement |
| linoleic acid measurement                        | other_measurement |
| linolenic acid measurement                       | other_measurement |
| lipid measurement                                | other_measurement |
| longevity                                        | other_measurement |

| #GWAS Ontology Term                              | Category                 |
|--------------------------------------------------|--------------------------|
| low density lipoprotein cholesterol measurement  | other_measurement        |
| magnesium measurement                            | other_measurement        |
| matrix metalloproteinase measurement             | other_measurement        |
| metabolite measurement                           | other_measurement        |
| mitochondrial DNA measurement                    | other_measurement        |
| mortality                                        | other_measurement        |
| myoglobin measurement                            | other_measurement        |
| N-glycan measurement                             | other_measurement        |
| nitric oxide exhalation measurement              | other_measurement        |
| oligoclonal band measurement                     | other_measurement        |
| omega-6 polyunsaturated fatty acid measurement   | other_measurement        |
| phospholipid measurement                         | other_measurement        |
| phosphorus measurement                           | other_measurement        |
| plasminogen activator inhibitor 1 measurement    | other_measurement        |
| protein measurement                              | other_measurement        |
| selenium measurement                             | other_measurement        |
| self rated health                                | other_measurement        |
| serum copper measurement                         | other_measurement        |
| serum dimethylarginine measurement               | other_measurement        |
| serum iron measurement                           | other_measurement        |
| serum metabolite measurement                     | other_measurement        |
| serum selenium measurement                       | other_measurement        |
| serum zinc measurement                           | other_measurement        |
| short sleep                                      | other_measurement        |
| skin conductance level                           | other_measurement        |
| skin conductance response amplitude              | other_measurement        |
| skin conductance response frequency              | other_measurement        |
| sleep duration                                   | other_measurement        |
| sleep measurement                                | other_measurement        |
| soluble transferrin receptor measurement         | other_measurement        |
| sphingolipid measurement                         | other_measurement        |
| survival time                                    | other_measurement        |
| telomere length                                  | other_measurement        |
| total cholesterol measurement                    | other_measurement        |
| transferrin measurement                          | other_measurement        |
| transferrin saturation measurement               | other_measurement        |
| urate measurement                                | other_measurement        |
| urinary metabolite measurement                   | other_measurement        |
| urinary uromodulin measurement                   | other_measurement        |
| very long-chain saturated fatty acid measurement | other_measurement        |
| vitamin B12 measurement                          | other_measurement        |
| vitamin D measurement                            | other_measurement        |
| vitamin measurement                              | other_measurement        |
| metabolic syndrome                               | other_metabolic_disorder |
| obesity                                          | other_metabolic_disorder |
| overweight body mass index status                | other_metabolic_disorder |
| age at menarche                                  | reproductive             |
| age at menopause                                 | reproductive             |
| azoospermia                                      | reproductive             |
| endometriosis                                    | reproductive             |
| erectile dysfunction                             | reproductive             |
| follicle stimulating hormone measurement         | reproductive             |
| gestational age                                  | reproductive             |
| hypospadias                                      | reproductive             |
| male infertility                                 | reproductive             |
| polycystic ovary syndrome                        | reproductive             |
| preeclampsia                                     | reproductive             |
| puberty                                          | reproductive             |
| puberty onset measurement                        | reproductive             |
| sexual dysfunction                               | reproductive             |
| testosterone measurement                         | reproductive             |
| uterine fibroid                                  | reproductive             |
| suntan                                           | skin                     |
| toxic epidermal necrolysis                       | skin                     |
| response to cold pressor test                    | stimulus_response        |
| response to radiation                            | stimulus_response        |
| response to red blood cell transfusion           | stimulus_response        |

**Table S9**

| GWAS Ontology Term                            | Observed Peak Count | Expected Peak Count | Expected Frequency | Observed Frequency | Freq FC | Raw P-Value | Corrected P-Value (fdr) | Category          |
|-----------------------------------------------|---------------------|---------------------|--------------------|--------------------|---------|-------------|-------------------------|-------------------|
| inflammatory bowel disease                    | 48                  | 15                  | 0.007628           | 0.023821           | 3.12    | 1.74E-11    | 8.44E-09                | immune_system     |
| immune system disease                         | 16                  | 2                   | 0.001165           | 0.007940           | 6.82    | 4.29E-09    | 1.04E-06                | immune_system     |
| erythrocyte measurement                       | 23                  | 5                   | 0.002620           | 0.011414           | 4.36    | 9.75E-09    | 1.58E-06                | blood             |
| multiple sclerosis                            | 56                  | 25                  | 0.012170           | 0.027792           | 2.28    | 2.80E-08    | 2.98E-06                | immune_system     |
| systemic lupus erythematosus                  | 42                  | 16                  | 0.007861           | 0.020844           | 2.65    | 3.06E-08    | 2.98E-06                | immune_system     |
| crohn's disease                               | 54                  | 25                  | 0.012287           | 0.026799           | 2.18    | 2.03E-07    | 1.64E-05                | immune_system     |
| systemic scleroderma                          | 18                  | 4                   | 0.002213           | 0.008933           | 4.04    | 1.09E-06    | 7.59E-05                | immune_system     |
| anti-Heliobacter pylori serum IgG measurement | 5                   | 0                   | 0.000116           | 0.002481           | 21.31   | 4.86E-06    | 2.62E-04                | immune_system     |
| self reported educational attainment          | 24                  | 8                   | 0.004076           | 0.011911           | 2.92    | 5.40E-06    | 2.62E-04                | brain             |
| ulcerative colitis                            | 36                  | 15                  | 0.007628           | 0.017866           | 2.34    | 4.54E-06    | 2.62E-04                | immune_system     |
| mood disorder                                 | 4                   | 0                   | 0.000058           | 0.001985           | 34.09   | 7.17E-06    | 3.17E-04                | brain_disease     |
| esophageal squamous cell carcinoma            | 8                   | 1                   | 0.000582           | 0.003970           | 6.82    | 3.13E-05    | 1.27E-03                | cancer            |
| rheumatoid arthritis                          | 53                  | 29                  | 0.014441           | 0.026303           | 1.82    | 3.81E-05    | 1.42E-03                | immune_system     |
| seasonal allergic rhinitis                    | 15                  | 4                   | 0.002155           | 0.007444           | 3.46    | 4.84E-05    | 1.68E-03                | immune_system     |
| parkinson's disease                           | 29                  | 13                  | 0.006347           | 0.014392           | 2.27    | 6.37E-05    | 2.06E-03                | brain_disease     |
| metabolite measurement                        | 24                  | 10                  | 0.004833           | 0.011911           | 2.46    | 7.74E-05    | 2.35E-03                | other_measurement |
| blood metabolite measurement                  | 47                  | 26                  | 0.012694           | 0.023325           | 1.84    | 8.30E-05    | 2.37E-03                | blood             |
| intracranial volume                           | 4                   | 0                   | 0.000116           | 0.001985           | 17.05   | 1.05E-04    | 2.82E-03                | body_measurement  |
| schizophrenia                                 | 67                  | 41                  | 0.020439           | 0.033251           | 1.63    | 1.14E-04    | 2.91E-03                | brain_disease     |
| platelet count                                | 25                  | 11                  | 0.005357           | 0.012407           | 2.32    | 1.43E-04    | 3.48E-03                | blood             |
| colorectal cancer                             | 23                  | 10                  | 0.004950           | 0.011414           | 2.31    | 2.74E-04    | 6.33E-03                | cancer            |
| progressive supranuclear palsy                | 7                   | 1                   | 0.000641           | 0.003474           | 5.42    | 3.84E-04    | 8.49E-03                | brain_disease     |
| psoriasis                                     | 14                  | 5                   | 0.002387           | 0.006948           | 2.91    | 4.74E-04    | 0.010                   | immune_system     |
| platelet aggregation                          | 12                  | 4                   | 0.001863           | 0.005955           | 3.20    | 5.26E-04    | 0.011                   | blood             |
| functional laterality                         | 8                   | 2                   | 0.000932           | 0.003970           | 4.26    | 7.29E-04    | 0.014                   | other_measurement |
| allergy                                       | 12                  | 4                   | 0.002038           | 0.005955           | 2.92    | 1.12E-03    | 0.021                   | immune_system     |
| urate measurement                             | 18                  | 8                   | 0.003901           | 0.008933           | 2.29    | 1.29E-03    | 0.023                   | other_measurement |
| cardiac troponin T measurement                | 8                   | 2                   | 0.001048           | 0.003970           | 3.79    | 1.53E-03    | 0.026                   | cardiovascular    |
| total blood protein measurement               | 5                   | 1                   | 0.000408           | 0.002481           | 6.09    | 1.58E-03    | 0.026                   | blood             |
| coronary heart disease                        | 30                  | 17                  | 0.008327           | 0.014888           | 1.79    | 2.17E-03    | 0.035                   | cardiovascular    |
| adhesion molecule measurement                 | 4                   | 1                   | 0.000291           | 0.001985           | 6.82    | 3.10E-03    | 0.046                   | other_measurement |
| nevus                                         | 4                   | 1                   | 0.000291           | 0.001985           | 6.82    | 3.10E-03    | 0.046                   | cancer            |
| soluble p-selectin measurement                | 4                   | 1                   | 0.000291           | 0.001985           | 6.82    | 3.10E-03    | 0.046                   | cardiovascular    |
| magnesium measurement                         | 5                   | 1                   | 0.000524           | 0.002481           | 4.73    | 4.58E-03    | 0.064                   | other_measurement |
| response to irinotecan                        | 5                   | 1                   | 0.000524           | 0.002481           | 4.73    | 4.58E-03    | 0.064                   | drug_response     |
| mean corpuscular volume                       | 17                  | 8                   | 0.004134           | 0.008437           | 2.04    | 5.38E-03    | 0.073                   | blood             |
| Brugada syndrome                              | 3                   | 0                   | 0.000175           | 0.001489           | 8.52    | 5.59E-03    | 0.073                   | cardiovascular    |
| vitiligo                                      | 11                  | 4                   | 0.002213           | 0.005459           | 2.47    | 6.19E-03    | 0.079                   | immune_system     |
| serum homoarginine measurement                | 2                   | 0                   | 0.000058           | 0.000993           | 17.05   | 6.37E-03    | 0.079                   | cardiovascular    |
| aggressive behavior                           | 6                   | 2                   | 0.000815           | 0.002978           | 3.65    | 6.80E-03    | 0.081                   | behavior          |
| osteoarthritis                                | 6                   | 2                   | 0.000815           | 0.002978           | 3.65    | 6.80E-03    | 0.081                   | immune_system     |
| body height                                   | 203                 | 172                 | 0.085250           | 0.100744           | 1.18    | 8.20E-03    | 0.095                   | body_measurement  |
| chronic lymphocytic leukemia                  | 11                  | 5                   | 0.002329           | 0.005459           | 2.34    | 8.86E-03    | 0.100                   | cancer            |
| protein c measurement                         | 4                   | 1                   | 0.000408           | 0.001985           | 4.87    | 9.90E-03    | 0.109                   | blood             |
| testicular carcinoma                          | 8                   | 3                   | 0.001456           | 0.003970           | 2.73    | 1.05E-02    | 0.113                   | cancer            |
| mean platelet volume                          | 13                  | 6                   | 0.003086           | 0.006452           | 2.09    | 1.15E-02    | 0.121                   | blood             |
| rhegmatogenous retinal detachment             | 3                   | 0                   | 0.000233           | 0.001489           | 6.39    | 1.22E-02    | 0.126                   | eye               |
| myeloperoxidase measurement                   | 4                   | 1                   | 0.000466           | 0.001985           | 4.26    | 1.54E-02    | 0.156                   | cardiovascular    |
| cups of coffee per day measurement            | 4                   | 1                   | 0.000524           | 0.001985           | 3.79    | 2.26E-02    | 0.219                   | behavior          |
| vitamin measurement                           | 4                   | 1                   | 0.000524           | 0.001985           | 3.79    | 2.26E-02    | 0.219                   | other_measurement |
| asbestos exposure measurement                 | 2                   | 0                   | 0.000116           | 0.000993           | 8.52    | 2.36E-02    | 0.225                   | other_measurement |
| personality trait                             | 10                  | 5                   | 0.002387           | 0.004963           | 2.08    | 2.53E-02    | 0.237                   | common_traits     |
| complement C3 measurement                     | 4                   | 1                   | 0.000582           | 0.001985           | 3.41    | 3.15E-02    | 0.283                   | immune_system     |
| complement C4 measurement                     | 4                   | 1                   | 0.000582           | 0.001985           | 3.41    | 3.15E-02    | 0.283                   | immune_system     |
| hepatitis B infection                         | 3                   | 1                   | 0.000349           | 0.001489           | 4.26    | 3.46E-02    | 0.290                   | immune_system     |
| infant body height                            | 5                   | 2                   | 0.000873           | 0.002481           | 2.84    | 3.35E-02    | 0.290                   | body_measurement  |
| kidney disease                                | 3                   | 1                   | 0.000349           | 0.001489           | 4.26    | 3.46E-02    | 0.290                   | kidney            |
| mean corpuscular hemoglobin                   | 17                  | 10                  | 0.005124           | 0.008437           | 1.65    | 3.44E-02    | 0.290                   | blood             |
| sporadic amyotrophic lateral sclerosis        | 18                  | 11                  | 0.005532           | 0.008933           | 1.61    | 3.54E-02    | 0.292                   | nervous_system    |
| multiple myeloma                              | 10                  | 5                   | 0.002562           | 0.004963           | 1.94    | 3.79E-02    | 0.307                   | cancer            |
| conduct disorder                              | 13                  | 8                   | 0.003727           | 0.006452           | 1.73    | 4.27E-02    | 0.329                   | brain_disease     |
| narcolepsy                                    | 5                   | 2                   | 0.000932           | 0.002481           | 2.66    | 4.22E-02    | 0.329                   | brain_disease     |
| short-term memory                             | 4                   | 1                   | 0.000641           | 0.001985           | 3.10    | 4.21E-02    | 0.329                   | brain             |
| atopic eczema                                 | 7                   | 3                   | 0.001630           | 0.003474           | 2.13    | 4.99E-02    | 0.349                   | immune_system     |
| biliary atresia                               | 2                   | 0                   | 0.000175           | 0.000993           | 5.68    | 4.92E-02    | 0.349                   | liver             |
| eye measurement                               | 6                   | 3                   | 0.001281           | 0.002978           | 2.32    | 4.76E-02    | 0.349                   | eye               |
| nt-probnp measurement                         | 2                   | 0                   | 0.000175           | 0.000993           | 5.68    | 4.92E-02    | 0.349                   | cardiovascular    |
| response to bevacizumab                       | 2                   | 0                   | 0.000175           | 0.000993           | 5.68    | 4.92E-02    | 0.349                   | drug_response     |
| tooth agenesis                                | 2                   | 0                   | 0.000175           | 0.000993           | 5.68    | 4.92E-02    | 0.349                   | dental            |

**Table S10**

| Aggregate Grammatical Class | GWAS Ontology Term                            | Observed Peak Count | Expected Peak Count | Expected Frequency | Observed Frequency | Freq FC  | Raw P-Value | Adjusted P-Value (fdr) | Category                 |
|-----------------------------|-----------------------------------------------|---------------------|---------------------|--------------------|--------------------|----------|-------------|------------------------|--------------------------|
| MCKG                        | crohn's disease                               | 25                  | 11                  | 0.012287           | 0.028027           | 2.28     | 1.69E-04    | 0.014                  | Immune System            |
|                             | esophageal squamous cell carcinoma            | 5                   | 1                   | 0.000582           | 0.005605           | 9.63     | 2.03E-04    | 0.014                  | Cancer                   |
|                             | inflammatory bowel disease                    | 19                  | 7                   | 0.007628           | 0.021300           | 2.79     | 8.39E-05    | 0.011                  | Immune System            |
|                             | multiple sclerosis                            | 23                  | 11                  | 0.012170           | 0.025785           | 2.12     | 8.11E-04    | 0.041                  | Immune System            |
|                             | response to irinotecan                        | 5                   | 0                   | 0.000524           | 0.005605           | 10.70    | 1.25E-04    | 0.013                  | drug_response            |
|                             | schizophrenia                                 | 37                  | 18                  | 0.020439           | 0.041480           | 2.03     | 6.06E-05    | 0.011                  | brain_disease            |
|                             | seasonal allergic rhinitis                    | 10                  | 2                   | 0.002155           | 0.011211           | 5.20     | 3.24E-05    | 0.011                  | Immune System            |
| ulcerative colitis          | 17                                            | 7                   | 0.007628            | 0.019058           | 2.50               | 6.70E-04 | 0.039       | Immune System          |                          |
| Three cell                  | blood metabolite measurement                  | 19                  | 6                   | 0.012694           | 0.040860           | 3.22     | 1.18E-05    | 1.74E-03               | Blood                    |
|                             | erythrocyte measurement                       | 9                   | 1                   | 0.002620           | 0.019355           | 7.39     | 5.17E-06    | 1.52E-03               | Blood                    |
|                             | inflammatory bowel disease                    | 13                  | 4                   | 0.007628           | 0.027957           | 3.66     | 7.91E-05    | 5.64E-03               | Immune System            |
|                             | mean corpuscular hemoglobin                   | 9                   | 2                   | 0.005124           | 0.019355           | 3.78     | 7.86E-04    | 0.039                  | Blood                    |
|                             | metabolic syndrome                            | 10                  | 2                   | 0.003901           | 0.021505           | 5.51     | 1.94E-05    | 1.90E-03               | other_metabolic_disorder |
|                             | psoriasis                                     | 6                   | 1                   | 0.002387           | 0.012903           | 5.40     | 9.93E-04    | 0.042                  | Immune System            |
|                             | systemic sclerosis                            | 7                   | 1                   | 0.002213           | 0.015054           | 6.80     | 9.59E-05    | 5.64E-03               | Immune System            |
| Two cell mixed              | immune system disease                         | 4                   | 0                   | 0.001165           | 0.017391           | 14.93    | 1.69E-04    | 0.035                  | Immune System            |
|                             | self reported educational attainment          | 6                   | 1                   | 0.004076           | 0.026087           | 6.40     | 4.06E-04    | 0.042                  | brain                    |
| Human specific              | anti-Heliobacter pylori serum IgG measurement | 3                   | 0                   | 0.000116           | 0.009063           | 77.82    | 9.19E-06    | 2.50E-03               | Immune System            |
|                             | erythrocyte measurement                       | 6                   | 1                   | 0.002620           | 0.018127           | 6.92     | 2.74E-04    | 0.025                  | Blood                    |
|                             | platelet count                                | 8                   | 2                   | 0.005357           | 0.024169           | 4.51     | 4.84E-04    | 0.033                  | Blood                    |
|                             | systemic lupus erythematosus                  | 11                  | 3                   | 0.007861           | 0.033233           | 4.23     | 7.91E-05    | 0.011                  | Immune System            |

**Table S11**

| Grammatical Class  | GWAS Ontology Term                            | Observed Peak Count | Expected Peak Count | Expected Frequency | Observed Frequency | Freq FC  | Raw P-Value | Adjusted P-Value (fdr)   | Category      |
|--------------------|-----------------------------------------------|---------------------|---------------------|--------------------|--------------------|----------|-------------|--------------------------|---------------|
| M                  | colorectal cancer                             | 1                   | 0                   | 0.004950           | 0.333333           | 67.35    | 0.015       | 0.022                    | cancer        |
|                    | immune system disease                         | 1                   | 0                   | 0.001165           | 0.333333           | 286.22   | 3.49E-03    | 0.022                    | immune_system |
|                    | mean corpuscular hemoglobin                   | 1                   | 0                   | 0.005124           | 0.333333           | 65.05    | 0.015       | 0.022                    | blood         |
|                    | mean corpuscular volume                       | 1                   | 0                   | 0.004134           | 0.333333           | 80.62    | 0.012       | 0.022                    | blood         |
|                    | platelet count                                | 1                   | 0                   | 0.005357           | 0.333333           | 62.22    | 0.016       | 0.022                    | blood         |
| C                  | mean platelet volume                          | 1                   | 0                   | 0.003086           | 0.333333           | 108.01   | 9.23E-03    | 0.028                    | blood         |
| K                  | --                                            | --                  | --                  | --                 | --                 | --       | --          | --                       | --            |
| G                  | alcohol drinking                              | 3                   | 0                   | 0.004542           | 0.060000           | 13.21    | 1.57E-03    | 0.037                    | behavior      |
|                    | anti-Heliobacter pylori serum IgG measurement | 3                   | 0                   | 0.000116           | 0.060000           | 515.19   | 3.08E-08    | 2.93E-06                 | immune_system |
|                    | celiac disease                                | 3                   | 0                   | 0.003901           | 0.060000           | 15.38    | 1.01E-03    | 0.032                    | gut           |
|                    | seasonal allergic rhinitis                    | 3                   | 0                   | 0.002155           | 0.060000           | 27.85    | 1.82E-04    | 8.63E-03                 | immune_system |
| KG                 | total blood protein measurement               | 2                   | 0                   | 0.000408           | 0.032787           | 80.44    | 2.99E-04    | 0.044                    | blood         |
| CG                 | --                                            | --                  | --                  | --                 | --                 | --       | --          | --                       | --            |
| CK                 | immune system disease                         | 4                   | 0                   | 0.001165           | 0.017391           | 14.93    | 1.69E-04    | 0.035                    | immune_system |
|                    | self reported educational attainment          | 6                   | 1                   | 0.004076           | 0.026087           | 6.40     | 4.06E-04    | 0.042                    | brain         |
| MC                 | --                                            | --                  | --                  | --                 | --                 | --       | --          | --                       | --            |
| MK                 | --                                            | --                  | --                  | --                 | --                 | --       | --          | --                       | --            |
| CKG                | blood metabolite measurement                  | 12                  | 4                   | 0.012694           | 0.038339           | 3.02     | 7.85E-04    | 0.032                    | blood         |
|                    | colorectal cancer                             | 7                   | 2                   | 0.004950           | 0.022364           | 4.52     | 1.07E-03    | 0.037                    | cancer        |
|                    | crohn's disease                               | 13                  | 4                   | 0.012287           | 0.041534           | 3.38     | 1.66E-04    | 0.010                    | immune_system |
|                    | erythrocyte measurement                       | 7                   | 1                   | 0.002620           | 0.022364           | 8.53     | 2.30E-05    | 3.17E-03                 | blood         |
|                    | immune system disease                         | 4                   | 0                   | 0.001165           | 0.012780           | 10.97    | 5.42E-04    | 0.026                    | immune_system |
|                    | inflammatory bowel disease                    | 11                  | 2                   | 0.007628           | 0.035144           | 4.61     | 3.69E-05    | 3.17E-03                 | immune_system |
|                    | mean corpuscular hemoglobin                   | 7                   | 2                   | 0.005124           | 0.022364           | 4.36     | 1.30E-03    | 0.040                    | blood         |
| metabolic syndrome | 8                                             | 1                   | 0.003901            | 0.025559           | 6.55               | 3.91E-05 | 3.17E-03    | other_metabolic_disorder |               |
| MCG                | --                                            | --                  | --                  | --                 | --                 | --       | --          | --                       | --            |
| MCK                | --                                            | --                  | --                  | --                 | --                 | --       | --          | --                       | --            |
| MCKG               | crohn's disease                               | 25                  | 11                  | 0.012287           | 0.028027           | 2.28     | 1.69E-04    | 0.014                    | immune_system |
|                    | esophageal squamous cell carcinoma            | 5                   | 1                   | 0.000582           | 0.005605           | 9.63     | 2.03E-04    | 0.014                    | cancer        |
|                    | inflammatory bowel disease                    | 19                  | 7                   | 0.007628           | 0.021300           | 2.79     | 8.39E-05    | 0.011                    | immune_system |
|                    | multiple sclerosis                            | 23                  | 11                  | 0.012170           | 0.025785           | 2.12     | 8.11E-04    | 0.041                    | immune_system |
|                    | response to irinotecan                        | 5                   | 0                   | 0.000524           | 0.005605           | 10.70    | 1.25E-04    | 0.013                    | drug_response |
|                    | schizophrenia                                 | 37                  | 18                  | 0.020439           | 0.041480           | 2.03     | 6.06E-05    | 0.011                    | brain_disease |
|                    | seasonal allergic rhinitis                    | 10                  | 2                   | 0.002155           | 0.011211           | 5.20     | 3.24E-05    | 0.011                    | immune_system |
|                    | ulcerative colitis                            | 17                  | 7                   | 0.007628           | 0.019058           | 2.50     | 6.70E-04    | 0.039                    | immune_system |
